# Supplementary material for: Genetic analysis of rice seedling traits related to machine transplanting under different seeding densities
Source: Research Square preprint supplement (doi:10.21203/rs.3.rs-51674/v2), 2020-10-14
Supplement: Supplementary file 1 [file 9792dde9120ca01b341fc33b.xlsx]

## Sheet: LD_Ex1
Table S6. Two-locus combinations showing significant epistatic effects under LD. LD, low density; MD, medium density; HD, high density; SH, seedling height; FLSL, first leaf sheath length; FLL, first leaf length; SLL, second leaf length; SDW, shoot dry weight; RDW, root dry weight. Var, the percentage (%) of variation explained by the interaction.
Trait	Locus_1	Locus_2	Epistasis_effect	Var	p_value
FLL	bin2212	bin2671	0.273501	9.10103	4.68e-06
FLL	bin2331	bin2593	0.269884	7.13769	4.78e-05
FLL	bin69	bin2529	0.241268	6.45129	8.68e-05
FLL	bin75	bin828	-0.294116	7.78264	3.82e-05
FLL	bin88	bin2041	0.248489	6.58728	7.97e-05
FLL	bin115	bin329	0.280133	8.24825	1.03e-05
FLL	bin254	bin1397	-0.23792	6.64561	8.97e-05
FLL	bin271	bin1375	-0.235979	6.76123	5.61e-05
FLL	bin336	bin2522	0.243429	6.36768	5.31e-05
FLL	bin345	bin2361	0.250965	7.07045	5.77e-05
FLL	bin430	bin1301	-0.270849	7.24645	8.18e-06
FLL	bin449	bin2649	-0.25673	7.90606	2.79e-05
FLL	bin463	bin2688	-0.260605	7.85898	2.47e-05
FLL	bin560	bin2438	0.271029	8.32188	4.39e-06
FLL	bin562	bin805	0.26364	8.16655	1.21e-05
FLL	bin564	bin1577	0.219108	5.80078	9.98e-05
FLL	bin616	bin2371	0.26084	8.28298	1.14e-05
FLL	bin621	bin2380	0.261529	7.99158	1.37e-05
FLL	bin639	bin999	-0.241591	6.76715	7.5e-05
FLL	bin902	bin1948	0.241326	6.78783	9.74e-05
FLL	bin910	bin2562	0.238981	6.59119	7.36e-05
FLL	bin1230	bin1269	-0.274689	7.45101	4.98e-05
FLL	bin1285	bin1340	0.255518	6.60415	9.26e-05
FLL	bin1440	bin2019	0.270727	6.56893	5.16e-05
FLL	bin1540	bin1938	0.259775	8.01776	1.15e-05
FLL	bin1549	bin1939	0.25351	7.63847	1.43e-05
FLL	bin1632	bin2370	0.234828	6.58744	7.04e-05
FLL	bin1709	bin1919	-0.240352	6.88107	7.28e-05
FLL	bin1765	bin2372	0.254914	8.00203	1.68e-05
FLL	bin1930	bin2214	0.27117	8.87284	5.3e-06
FLL	bin1951	bin2253	0.263815	8.36977	1.12e-05
SH	bin4	bin1347	0.949364	6.95813	9.37366e-05
SH	bin19	bin2760	1.0519	7.4792	4.99256e-05
SH	bin25	bin2212	-1.19558	8.89573	1.01821e-05
SH	bin37	bin254	-1.08329	8.4516	1.72942e-05
SH	bin53	bin999	-1.03697	7.79432	3.88192e-05
SH	bin64	bin1859	-1.03104	8.23426	2.30421e-05
SH	bin66	bin1817	-1.05403	8.24678	2.20014e-05
SH	bin107	bin894	1.17797	10.1105	1.98301e-06
SH	bin147	bin2459	1.01796	7.47971	3.47159e-05
SH	bin205	bin2727	-1.00152	6.77094	4.79021e-05
SH	bin210	bin440	-1.12678	9.63748	4.10837e-06
SH	bin212	bin2747	-0.971713	6.82122	8.09732e-05
SH	bin254	bin1290	-1.0124	7.86893	3.19939e-05
SH	bin255	bin1104	-0.954015	6.95587	9.59939e-05
SH	bin269	bin1899	-0.965044	6.66942	8.81047e-05
SH	bin270	bin2449	-1.04677	6.66942	9.39948e-06
SH	bin271	bin459	-1.00056	6.14403	2.99877e-05
SH	bin272	bin2104	-1.08321	6.14403	1.44032e-05
SH	bin344	bin2479	-1.01569	7.7464	1.86833e-05
SH	bin380	bin460	-1.00925	7.40625	6.13879e-05
SH	bin423	bin1293	-1.01982	8.02678	2.56035e-05
SH	bin431	bin1400	-0.997187	7.68396	4.02747e-05
SH	bin437	bin1209	-1.16946	10.215	1.97064e-06
SH	bin455	bin2124	-1.09252	9.28277	5.97587e-06
SH	bin459	bin2645	-0.995328	7.624	3.95228e-05
SH	bin461	bin1969	-1.00947	6.71948	3.3541e-05
SH	bin478	bin2648	-1.03878	8.21265	2.00535e-05
SH	bin496	bin2654	-1.02538	7.96759	2.54608e-05
SH	bin497	bin1479	1.03695	7.48347	4.87598e-05
SH	bin501	bin1466	1.01036	7.48822	4.9403e-05
SH	bin510	bin670	1.02403	7.17744	7.89816e-05
SH	bin542	bin2175	0.961399	7.29765	5.91075e-05
SH	bin555	bin2478	1.19388	10.7119	6.90874e-07
SH	bin935	bin2374	0.976843	7.46928	5.29309e-05
SH	bin936	bin2373	-1.01187	7.18535	3.00821e-05
SH	bin943	bin1663	-1.01267	7.50572	2.74499e-05
SH	bin992	bin1697	-1.13903	9.91889	2.97643e-06
SH	bin997	bin1207	-1.09389	8.85791	1.06899e-05
SH	bin1006	bin2680	-1.11657	9.39886	5.58887e-06
SH	bin1028	bin2720	-1.1155	9.28135	6.33464e-06
SH	bin1147	bin1398	-1.08822	8.38999	1.68097e-05
SH	bin1210	bin1913	-0.976925	6.90822	9.58144e-05
SH	bin1220	bin1400	-0.986432	7.35538	5.98276e-05
SH	bin1265	bin1886	-1.01102	7.97239	3.13775e-05
SH	bin1376	bin1814	-0.984191	7.47651	5.2578e-05
SH	bin1466	bin1889	-0.959626	7.17495	8.1353e-05
SH	bin1709	bin1954	-0.978318	7.24716	6.92572e-05
SH	bin1862	bin1703	1.10841	8.71252	1.16308e-05
SH	bin1895	bin1913	-1.02744	7.96305	3.11052e-05
SH	bin1908	bin2174	-0.973013	7.24026	6.89333e-05
SH	bin1939	bin2718	-1.00239	7.48369	5.32958e-05
SH	bin2097	bin2730	-1.05586	7.42313	5.77465e-05
SH	bin1939	bin2192	0.958684	6.98112	8.73122e-05
SH	bin2097	bin2728	-1.04755	7.15434	7.98088e-05
RDW	bin77	bin1704	-1.02837	6.70932	9.3391e-05
RDW	bin85	bin459	-0.941495	7.25715	5.90529e-05
RDW	bin149	bin496	-1.04196	8.30812	1.47986e-05
RDW	bin150	bin497	-1.00505	7.78948	2.68439e-05
RDW	bin208	bin2388	-1.01723	8.75296	1.23479e-05
RDW	bin222	bin2487	-1.03464	8.72301	1.28497e-05
RDW	bin223	bin1940	-0.911293	7.17662	8.39371e-05
RDW	bin229	bin390	-1.04292	8.6011	1.38995e-05
RDW	bin245	bin378	-1.00629	7.8977	3.03657e-05
RDW	bin280	bin622	-1.00725	8.48049	1.36408e-05
RDW	bin297	bin613	-0.955672	7.32475	6.14748e-05
RDW	bin312	bin1194	-1.01786	7.56918	4.78531e-05
RDW	bin318	bin2172	-1.18722	11.3346	3.80873e-07
RDW	bin322	bin637	-1.12769	9.2118	6.31931e-06
RDW	bin322	bin1269	-1.02277	8.30054	1.79644e-05
RDW	bin328	bin2403	-1.01241	6.73944	3.62514e-05
RDW	bin328	bin1248	-0.965407	7.06146	7.90767e-05
RDW	bin329	bin2178	-1.1638	10.5101	1.3081e-06
RDW	bin339	bin1454	-1.11706	7.66419	4.03348e-05
RDW	bin470	bin1192	-0.909193	7.04683	8.73938e-05
RDW	bin519	bin1602	0.990726	8.16049	2.27457e-05
RDW	bin707	bin1456	-0.994996	7.34339	6.19731e-05
RDW	bin808	bin2484	-1.10949	8.21458	2.31621e-05
RDW	bin1153	bin2749	-1.00207	7.91553	3.12571e-05
RDW	bin1153	bin1836	-0.958755	6.85876	5.64467e-05
RDW	bin1158	bin2263	-0.90191	6.93067	9.47612e-05
RDW	bin1826	bin2437	-0.98636	7.36181	4.47959e-05
SLL	bin2400	bin2719	-0.627106	6.59609	7.22869e-05
SLL	bin242	bin1297	-0.626713	6.96263	7.91157e-05
SLL	bin249	bin1943	-0.657339	7.52051	3.58265e-05
SLL	bin255	bin1320	-0.63967	7.06523	6.25793e-05
SLL	bin263	bin1375	-0.6349	7.2268	5.32232e-05
SLL	bin342	bin460	-0.645731	6.91665	8.44535e-05
SLL	bin344	bin456	-0.699424	8.07648	2.05369e-05
SLL	bin410	bin2640	-0.64006	7.1261	6.24202e-05
SLL	bin427	bin1297	-0.737842	9.69754	3.21006e-06
SLL	bin430	bin2680	-0.673802	6.89573	4.21872e-05
SLL	bin430	bin1300	-0.821391	11.7237	1.90748e-07
SLL	bin450	bin2653	-0.686081	7.81655	2.78415e-05
SLL	bin453	bin2654	-0.722244	8.50399	1.1958e-05
SLL	bin456	bin2648	-0.72766	9.18165	5.52237e-06
SLL	bin560	bin2438	0.721602	9.07478	5.31609e-06
SLL	bin621	bin2377	0.637207	6.80441	8.0421e-05
SLL	bin712	bin2516	-0.633693	6.86479	4.01844e-05
SLL	bin717	bin1633	-0.705371	7.43879	3.49465e-05
SLL	bin901	bin1140	0.680476	7.63809	1.78723e-05
SLL	bin979	bin1404	-0.741172	9.34881	4.82333e-06
SLL	bin1002	bin1224	-0.653236	7.25903	6.80227e-05
SLL	bin1028	bin2719	-0.760631	9.21624	6.28534e-06
SLL	bin1204	bin1867	-0.656384	7.61818	3.64831e-05
SLL	bin1209	bin1869	-0.62312	6.83225	9.62367e-05
SLL	bin1334	bin1681	-0.67174	7.88217	2.13615e-05
SLL	bin1579	bin1860	-0.731691	9.26426	1.49153e-06
SLL	bin1613	bin2745	-0.659179	7.68891	2.58873e-05
SLL	bin1709	bin1913	-0.977963	16.4083	5.88794e-10
SLL	bin1725	bin2746	-0.687235	6.6976	2.93835e-05
SLL	bin1726	bin2747	-0.691481	7.33751	2.79792e-05
SLL	bin1797	bin2285	-0.667241	7.49811	4.33395e-05
SLL	bin1862	bin2173	-0.711825	8.83938	5.51141e-06
SLL	bin1999	bin2114	0.629285	6.86721	9.68921e-05
FLSL	bin69	bin1390	-0.23267	7.40634	6.07286e-05
FLSL	bin101	bin906	0.265939	10.6706	1.1002e-06
FLSL	bin117	bin880	0.22485	6.95769	9.85428e-05
FLSL	bin160	bin2719	-0.221907	7.37659	6.03555e-05
FLSL	bin166	bin909	0.222226	7.53693	4.63421e-05
FLSL	bin241	bin1293	-0.223712	7.68044	4.20999e-05
FLSL	bin249	bin1290	-0.216125	7.123	8.32776e-05
FLSL	bin538	bin2476	0.260022	9.94468	1.9971e-06
FLSL	bin560	bin2444	0.232413	8.00037	2.74331e-05
FLSL	bin963	bin2724	-0.245577	9.29961	6.32609e-06
FLSL	bin1028	bin2721	-0.261659	9.32391	6.09117e-06
FLSL	bin1377	bin2725	-0.230382	7.97704	3.08729e-05
FLSL	bin1651	bin1932	-0.232223	8.30608	2.10558e-05
FLSL	bin1672	bin1946	-0.240561	8.70514	1.28024e-05
FLSL	bin1714	bin1918	-0.277403	11.4478	4.63228e-07
FLSL	bin1726	bin2750	-0.257094	6.95569	4.9325e-06
FLSL	bin1941	bin2395	-0.222033	7.45778	5.48345e-05
SDW	bin20	bin1650	1.94605	6.95052	9.79765e-05
SDW	bin89	bin892	1.9048	7.13878	6.16181e-05
SDW	bin162	bin1557	-1.89205	6.78361	9.73183e-05
SDW	bin190	bin2266	1.8771	7.14139	7.40089e-05
SDW	bin207	bin438	-1.98426	8.01945	2.73238e-05
SDW	bin210	bin440	-2.05271	8.65266	1.35383e-05
SDW	bin228	bin1290	-1.86999	7.45362	5.58329e-05
SDW	bin242	bin1377	-1.89038	7.38476	6.24559e-05
SDW	bin281	bin465	-2.19845	10.2302	1.98929e-06
SDW	bin298	bin622	-1.92507	7.07534	8.48602e-05
SDW	bin336	bin630	-2.04477	7.69064	3.99603e-05
SDW	bin391	bin444	-2.27793	9.54704	4.757e-06
SDW	bin395	bin1507	-2.10021	7.39403	6.22876e-05
SDW	bin432	bin1219	-2.24244	10.1221	2.18412e-06
SDW	bin445	bin1778	-2.14722	9.47892	5.15863e-06
SDW	bin488	bin1713	2.15718	9.10854	7.92867e-06
SDW	bin496	bin1479	2.00896	7.59871	4.91107e-05
SDW	bin496	bin1724	2.01437	8.3151	2.04587e-05
SDW	bin574	bin2334	-1.9765	8.01165	2.89816e-05
SDW	bin730	bin1320	-2.1663	8.40573	1.1879e-05
SDW	bin988	bin2397	-2.00075	7.88999	3.34659e-05
SDW	bin1009	bin1282	-1.95621	7.58914	4.92692e-05
SDW	bin1015	bin1265	-2.02094	7.98022	2.78981e-05
SDW	bin1028	bin1398	-2.09252	8.39211	1.82479e-05
SDW	bin1029	bin1295	-2.1498	8.5911	1.40999e-05
SDW	bin1030	bin1336	-2.08698	7.88454	2.60994e-05
SDW	bin1032	bin2461	-2.23036	8.24069	1.90015e-05
SDW	bin1034	bin1404	-1.91892	6.778	9.75231e-05
SDW	bin1036	bin2456	-2.01201	6.62075	5.11414e-05
SDW	bin1118	bin1375	-2.07186	8.07208	1.59114e-05
SDW	bin1149	bin1914	-1.96567	7.57083	3.9912e-05
SDW	bin1212	bin1400	-1.94158	7.63887	4.38947e-05
SDW	bin1243	bin2406	-1.82773	6.84614	8.22456e-05
SDW	bin1258	bin2413	-1.89966	6.48824	4.27438e-05
SDW	bin1265	bin1964	-1.98265	8.24868	1.37879e-05
SDW	bin1272	bin2750	-1.93755	7.94586	3.02919e-05
SDW	bin1283	bin2689	-1.9799	7.66961	4.38837e-05
SDW	bin1296	bin1823	-1.84437	7.21354	7.35794e-05
SDW	bin1297	bin1825	-1.86112	7.10318	8.24392e-05
SDW	bin1320	bin2070	-1.87798	7.23822	5.19633e-05
SDW	bin1330	bin1701	-1.8991	7.27736	4.73411e-05
SDW	bin1571	bin1602	-1.88925	7.07575	8.6272e-05
SDW	bin1572	bin1601	-2.04036	8.35866	1.82712e-05
SDW	bin1936	bin2525	1.88825	7.45228	2.31727e-05
SDW	bin1999	bin2047	2.07332	8.22261	2.01308e-05
SDW	bin2127	bin2409	-1.83627	6.71871	7.51889e-05
SDW	bin2133	bin2424	-1.90429	7.3782	5.00074e-05
SDW	bin2149	bin2612	-1.88555	7.21509	6.64833e-05
SDW	bin2156	bin2471	-1.98075	7.88771	2.84089e-05

## Sheet: MD_Ex1
Table S6. Two-locus combinations showing significant epistatic effects under MD. LD, low density; MD, medium density; HD, high density; SH, seedling height; FLSL, first leaf sheath length; FLL, first leaf length; SLL, second leaf length; SDW, shoot dry weight; RDW, root dry weight. Var, the percentage (%) of variation explained by the interaction.
Trait	Locus_1	Locus_2	Epistasis_effect	Var	p_value
FLL	bin41	bin1234	0.263627	8.00897	9.31e-06
FLL	bin98	bin2217	0.233928	6.83275	4.29e-05
FLL	bin99	bin1185	0.242669	7.20281	3e-05
FLL	bin114	bin542	0.248909	7.75056	1.61e-05
FLL	bin2645	bin2778	0.237445	7.13073	5.92e-05
FLL	bin254	bin1397	-0.233529	6.83695	4.35e-05
FLL	bin255	bin1395	-0.236701	7.13237	3.24e-05
FLL	bin330	bin2530	0.250408	6.71293	5.83e-05
FLL	bin360	bin1401	-0.241377	7.42403	2.75e-05
FLL	bin373	bin1398	-0.245727	7.76229	1.35e-05
FLL	bin455	bin1299	-0.242181	6.89493	7.6e-05
FLL	bin559	bin2433	0.242786	7.51191	1.72e-05
FLL	bin561	bin2381	0.240654	7.53639	1.81e-05
FLL	bin561	bin1580	0.26818	9.18035	7.3e-07
FLL	bin565	bin1574	0.254463	8.50843	7.56e-07
FLL	bin593	bin1185	0.23458	6.5786	8.83e-05
FLL	bin698	bin901	0.270661	7.16291	2.87e-05
FLL	bin1154	bin1235	0.238372	6.7505	5.23e-05
FLL	bin1371	bin1466	-0.23639	6.67582	7.82e-05
FLL	bin1404	bin2136	-0.22858	6.33618	9.84e-05
FLL	bin1419	bin1627	-0.231004	6.66293	6.98e-05
FLL	bin1419	bin2141	-0.224613	6.33287	8.3e-05
FLL	bin1915	bin2216	0.257811	8.38385	5.81e-06
FLL	bin1945	bin2107	0.233067	6.76236	5.17e-05
FLL	bin2019	bin2629	0.244418	7.08968	6.21e-05
SH	bin16	bin2198	-1.18978	8.513	1.54301e-05
SH	bin30	bin2206	-1.36706	8.73335	1.14826e-05
SH	bin37	bin2386	1.1135	6.85147	8.54351e-05
SH	bin37	bin254	-1.17427	8.19657	2.19517e-05
SH	bin42	bin1274	-1.10969	7.54326	4.09458e-05
SH	bin53	bin999	-1.14026	7.77869	3.65435e-05
SH	bin66	bin1817	-1.25637	9.67075	3.57143e-06
SH	bin73	bin2595	-1.36212	7.46455	5.00515e-05
SH	bin108	bin894	1.21917	8.96037	7.7407e-06
SH	bin166	bin2110	-1.07091	7.19954	5.33287e-05
SH	bin174	bin2171	-1.2791	10.4713	1.05704e-06
SH	bin250	bin1956	-1.13283	8.18571	2.44442e-05
SH	bin254	bin1225	-1.0865	7.067	9.17209e-05
SH	bin254	bin1290	-1.07635	7.34113	5.36558e-05
SH	bin270	bin2104	-1.11795	7.39869	5.58633e-05
SH	bin378	bin1291	-1.11799	7.8483	2.71493e-05
SH	bin411	bin1290	-1.13072	8.1801	1.9074e-05
SH	bin419	bin1408	-1.07168	7.42238	6.0708e-05
SH	bin455	bin2675	-1.16886	8.34451	1.80529e-05
SH	bin459	bin1843	-1.04895	7.08851	8.93327e-05
SH	bin497	bin2754	1.08476	6.63987	7.39312e-05
SH	bin499	bin1479	1.18148	8.05272	2.49763e-05
SH	bin501	bin1478	1.20703	8.43932	1.59198e-05
SH	bin531	bin2374	1.06164	7.01269	9.57317e-05
SH	bin541	bin2494	1.03593	6.93282	6.44373e-05
SH	bin542	bin2474	1.06465	7.00326	7.56749e-05
SH	bin557	bin1586	1.20616	9.09405	6.90078e-06
SH	bin559	bin1584	1.20628	9.22825	5.06044e-06
SH	bin572	bin1583	1.23019	9.39383	3.99478e-06
SH	bin659	bin955	-1.20833	8.79071	1.06247e-05
SH	bin665	bin798	-1.10554	7.38996	5.94075e-05
SH	bin992	bin1207	-1.30137	10.3474	1.77146e-06
SH	bin997	bin2675	-1.22983	9.28405	6.39437e-06
SH	bin1006	bin2720	-1.26565	9.86164	2.97913e-06
SH	bin1028	bin1404	-1.22372	6.74442	1.11138e-05
SH	bin1052	bin1845	-1.16915	8.09112	2.47489e-05
SH	bin1118	bin1817	-1.18971	8.70056	9.13453e-06
SH	bin1166	bin2525	1.09089	7.53984	3.14714e-05
SH	bin1211	bin1886	-1.11025	7.95525	3.16253e-05
SH	bin1265	bin1889	-1.11229	7.95609	2.98397e-05
SH	bin1468	bin1703	1.13078	7.48433	5.08761e-05
SH	bin1485	bin1901	-1.18569	7.53509	4.50504e-05
SH	bin1602	bin2092	-1.07916	6.72489	8.55217e-05
SH	bin1620	bin2091	-1.12463	6.72489	7.76353e-05
SH	bin1735	bin1892	-1.08833	6.72489	5.08978e-05
SH	bin1866	bin2174	-1.20437	6.72489	6.5044e-06
SH	bin2089	bin2744	-1.1183	6.72489	4.64035e-05
SH	bin2094	bin2728	-1.1153	6.72489	8.64744e-05
RDW	bin81	bin507	-0.858485	7.43287	5.81955e-05
RDW	bin85	bin463	-0.832606	8.76037	9.86456e-06
RDW	bin319	bin2174	-0.84184	8.84653	1.05041e-05
RDW	bin422	bin1283	0.762984	7.56622	4.82177e-05
RDW	bin577	bin940	0.899195	10.7568	1.07711e-06
RDW	bin1766	bin2004	-0.775195	7.7898	3.39219e-05
SLL	bin22	bin2765	0.803914	8.4809	1.61893e-05
SLL	bin32	bin2767	0.793109	7.24422	7.28523e-05
SLL	bin54	bin181	-0.699519	6.76541	7.73505e-05
SLL	bin2400	bin2719	-0.701142	6.365	4.14644e-05
SLL	bin2403	bin2726	-0.68867	6.365	5.66262e-05
SLL	bin114	bin878	0.688937	6.79067	7.37404e-05
SLL	bin160	bin2725	-0.713777	7.51544	3.00223e-05
SLL	bin161	bin2732	-0.662041	6.58425	7.05087e-05
SLL	bin185	bin2727	-0.707696	7.27442	4.11721e-05
SLL	bin197	bin2686	-0.863657	8.18975	1.08293e-05
SLL	bin210	bin2171	-0.666264	6.33156	9.83917e-05
SLL	bin231	bin1037	-0.736721	7.15619	5.2278e-05
SLL	bin248	bin2726	-0.707521	7.36694	4.72405e-05
SLL	bin251	bin1377	-0.691827	7.18674	5.16593e-05
SLL	bin270	bin2118	-0.695853	7.14506	6.3573e-05
SLL	bin360	bin1398	-0.725015	7.705	3.16337e-05
SLL	bin422	bin1297	-0.676525	6.81893	7.18184e-05
SLL	bin427	bin1296	-0.69571	7.30998	4.07507e-05
SLL	bin430	bin1299	-0.732356	7.78349	2.53326e-05
SLL	bin489	bin1479	0.740987	7.23665	5.52858e-05
SLL	bin497	bin2302	0.682862	7.01645	9.4379e-05
SLL	bin501	bin1478	0.742578	7.43921	4.58098e-05
SLL	bin559	bin2438	0.695834	6.49065	6.12326e-05
SLL	bin559	bin1582	0.692253	7.01154	4.63126e-05
SLL	bin561	bin2435	0.687854	6.56341	7.24589e-05
SLL	bin564	bin2380	0.673728	6.77654	8.85868e-05
SLL	bin621	bin2378	0.744654	8.01226	2.014e-05
SLL	bin667	bin2418	-0.763979	8.01737	1.91934e-05
SLL	bin695	bin901	0.763085	6.41057	8.76222e-05
SLL	bin889	bin1110	0.74754	7.05345	6.19384e-05
SLL	bin901	bin1140	0.710696	7.04201	5.31983e-05
SLL	bin902	bin1938	0.736335	7.8398	2.91643e-05
SLL	bin910	bin1555	0.775531	8.40883	5.4219e-06
SLL	bin935	bin1134	-0.679175	6.89902	7.39686e-05
SLL	bin966	bin1404	-0.804679	9.48737	3.49019e-06
SLL	bin1029	bin2719	-0.869731	10.0758	1.93938e-06
SLL	bin1709	bin1920	-0.732424	7.86154	2.48556e-05
SLL	bin1831	bin2426	-0.696036	6.7446	8.01751e-05
SLL	bin1832	bin2421	-0.711733	6.98569	5.52485e-05
SLL	bin1834	bin2408	-0.677505	6.72635	6.31087e-05
SLL	bin1845	bin2745	-0.714798	7.10304	6.87317e-05
SLL	bin1862	bin2180	-0.773097	8.86697	4.67894e-06
SLL	bin1915	bin2217	0.727804	7.72039	2.70422e-05
SLL	bin1927	bin2725	-0.737255	7.7098	3.19416e-05
SLL	bin2019	bin2708	0.734986	6.93884	3.60738e-05
FLSL	bin21	bin2765	0.233759	7.57246	4.36842e-05
FLSL	bin25	bin2218	-0.285559	10.3343	1.84823e-06
FLSL	bin37	bin254	-0.223171	7.28156	6.87328e-05
FLSL	bin53	bin999	-0.229302	7.73685	4.14914e-05
FLSL	bin54	bin160	-0.229702	7.46309	5.06971e-05
FLSL	bin57	bin1001	-0.232676	8.08388	2.59992e-05
FLSL	bin64	bin1959	-0.217938	7.22094	7.432e-05
FLSL	bin67	bin1817	-0.241196	8.82841	1.04238e-05
FLSL	bin71	bin509	0.220482	7.50397	4.13145e-05
FLSL	bin109	bin902	0.218704	7.49002	4.46948e-05
FLSL	bin125	bin542	0.226438	7.57627	4.57325e-05
FLSL	bin160	bin2726	-0.212641	7.02285	7.93867e-05
FLSL	bin183	bin1205	-0.222045	7.18821	7.02192e-05
FLSL	bin200	bin2686	-0.253137	7.55601	3.34754e-05
FLSL	bin210	bin2171	-0.223781	6.45868	4.09326e-05
FLSL	bin253	bin1037	-0.223148	7.05516	8.54644e-05
FLSL	bin265	bin1372	-0.21046	7.11351	8.6474e-05
FLSL	bin270	bin1392	-0.225037	7.90199	3.39767e-05
FLSL	bin270	bin2104	-0.24185	8.51637	1.58289e-05
FLSL	bin403	bin1860	-0.242128	9.1056	7.55267e-06
FLSL	bin407	bin1290	-0.244149	9.29399	5.021e-06
FLSL	bin423	bin1637	-0.212833	6.91012	9.37444e-05
FLSL	bin478	bin1299	-0.219849	7.4176	4.97154e-05
FLSL	bin492	bin1479	0.247335	8.56371	1.26926e-05
FLSL	bin501	bin1478	0.251051	8.97936	7.47067e-06
FLSL	bin621	bin1570	0.215026	7.204	4.97928e-05
FLSL	bin640	bin1662	0.209099	6.88777	9.58756e-05
FLSL	bin667	bin955	-0.234774	7.88043	3.40717e-05
FLSL	bin983	bin1404	-0.239385	8.68885	1.27413e-05
FLSL	bin984	bin1207	-0.216563	7.16446	8.11637e-05
FLSL	bin1028	bin2719	-0.263932	9.90465	2.98367e-06
FLSL	bin1130	bin1813	-0.233163	8.37686	1.53125e-05
FLSL	bin1131	bin1817	-0.230635	8.28487	1.64042e-05
FLSL	bin1167	bin1666	-0.216093	7.09865	8.62289e-05
FLSL	bin1210	bin1860	-0.236262	8.79345	1.13401e-05
FLSL	bin1328	bin2726	-0.216032	7.47559	4.52246e-05
FLSL	bin1356	bin1954	-0.225167	7.8926	3.46263e-05
FLSL	bin1359	bin2750	-0.223008	7.57191	4.92386e-05
FLSL	bin1368	bin2745	-0.224088	7.65101	4.20704e-05
FLSL	bin1408	bin2137	-0.215803	7.04287	9.16735e-05
FLSL	bin1709	bin1918	-0.215347	7.17867	7.89615e-05
FLSL	bin1862	bin2174	-0.240861	9.0064	8.1888e-06
FLSL	bin1927	bin2725	-0.228403	7.81431	3.57924e-05
FLSL	bin2013	bin2706	0.240344	8.74609	1.24735e-05
SDW	bin23	bin2774	1.55645	8.97705	8.42861e-06
SDW	bin53	bin1408	-1.28469	7.09325	7.82126e-05
SDW	bin54	bin1409	-1.3782	8.15677	2.3355e-05
SDW	bin102	bin901	1.26815	7.03187	5.74538e-05
SDW	bin142	bin542	1.27463	6.75144	8.58637e-05
SDW	bin260	bin437	-1.59865	11.3119	3.70219e-07
SDW	bin262	bin438	-1.6147	11.4585	3.40092e-07
SDW	bin274	bin435	-1.60545	11.182	4.71398e-07
SDW	bin390	bin470	-1.35392	7.49942	4.93832e-05
SDW	bin391	bin468	-1.4084	7.99754	2.60236e-05
SDW	bin434	bin1206	-1.39184	8.36925	1.69678e-05
SDW	bin435	bin2685	-1.3942	8.27438	1.39208e-05
SDW	bin437	bin702	-1.39197	7.95931	2.35893e-05
SDW	bin445	bin1804	-1.37823	7.97182	2.68104e-05
SDW	bin464	bin2713	-1.26606	7.08096	7.33169e-05
SDW	bin488	bin1455	1.37646	7.85671	3.26832e-05
SDW	bin901	bin1847	1.32082	7.76277	3.00642e-05
SDW	bin988	bin2680	-1.32102	7.61124	4.3748e-05
SDW	bin1001	bin1299	-1.39794	8.22649	1.47682e-05
SDW	bin1004	bin1296	-1.37043	7.94021	2.16831e-05
SDW	bin1009	bin1282	-1.44576	8.80479	9.16248e-06
SDW	bin1013	bin1265	-1.4284	8.60378	1.38732e-05
SDW	bin1270	bin2480	-1.27101	6.88819	7.47752e-05

## Sheet: HD_Ex1
Table S6. Two-locus combinations showing significant epistatic effects under HD. LD, low density; MD, medium density; HD, high density; SH, seedling height; FLSL, first leaf sheath length; FLL, first leaf length; SLL, second leaf length; SDW, shoot dry weight; RDW, root dry weight. Var, the percentage (%) of variation explained by the interaction.
Trait	Locus_1	Locus_2	Epistasis_effect	Var	p_value
FLL	bin99	bin1182	0.288355	7.05518	5.67e-05
FLL	bin142	bin1782	-0.301718	6.77094	7.06e-05
FLL	bin2487	bin711	-0.278016	6.70396	8.11e-05
FLL	bin159	bin702	-0.349873	7.43929	3.7e-05
FLL	bin159	bin1804	-0.303872	6.52368	8.88e-05
FLL	bin160	bin1783	-0.293078	6.43265	9.69e-05
FLL	bin225	bin1197	-0.278304	6.63127	7.64e-05
FLL	bin455	bin1300	-0.300918	7.53814	3.93e-05
FLL	bin562	bin1179	0.275217	6.65862	9.04e-05
FLL	bin562	bin1538	0.300185	7.7784	1.74e-05
FLL	bin566	bin1556	0.293403	7.28613	1.88e-05
FLL	bin571	bin1558	0.28878	6.93359	2.96e-05
FLL	bin572	bin1564	0.297119	7.29414	2.12e-05
FLL	bin622	bin2577	0.636965	7.57739	3.3e-05
FLL	bin669	bin1784	-0.343094	8.82578	7.16e-06
FLL	bin684	bin1767	-0.431637	10.3929	9.54e-07
FLL	bin811	bin2568	0.285212	6.93809	4.9e-05
FLL	bin983	bin1415	-0.280407	6.73552	9.54e-05
FLL	bin1193	bin1780	-0.289581	7.04523	5.23e-05
FLL	bin1227	bin1787	-0.324115	8.25377	1.14e-05
FLL	bin1392	bin1734	-0.29575	7.21693	6.62e-05
FLL	bin1566	bin2168	0.277122	6.1238	9.17e-05
FLL	bin1598	bin2574	0.749597	8.17182	8.02e-06
FLL	bin1915	bin2214	0.285637	7.06495	5.86e-05
SH	bin21	bin2387	1.26004	9.34903	5.88218e-06
SH	bin25	bin2205	-1.31234	9.16708	7.33939e-06
SH	bin53	bin1378	-1.16482	7.53387	4.88338e-05
SH	bin54	bin1861	-1.22705	9.7772	3.20343e-06
SH	bin57	bin1370	-1.13281	7.09423	8.40095e-05
SH	bin72	bin1389	-1.16152	8.35	1.78087e-05
SH	bin73	bin2595	-1.42832	8.52483	1.53515e-05
SH	bin107	bin894	1.31235	10.7576	8.48124e-07
SH	bin139	bin878	1.08577	7.07886	7.40317e-05
SH	bin147	bin2461	1.24965	9.63757	2.43397e-06
SH	bin174	bin2175	-1.05028	7.21133	5.77735e-05
SH	bin185	bin610	-1.06547	6.96486	8.39123e-05
SH	bin200	bin2727	-1.08523	7.54088	4.62651e-05
SH	bin336	bin644	-1.21379	8.04014	2.23302e-05
SH	bin378	bin1293	-1.05443	7.32602	4.87724e-05
SH	bin410	bin1296	-1.04662	7.28691	4.69324e-05
SH	bin439	bin2139	-1.08325	7.83208	3.41551e-05
SH	bin455	bin2628	-1.16151	8.48877	1.4646e-05
SH	bin458	bin1969	-1.16109	8.95338	9.7148e-06
SH	bin501	bin1478	1.09909	7.26769	5.83475e-05
SH	bin542	bin2494	1.09184	8.02991	1.95604e-05
SH	bin667	bin1828	-1.16425	7.87917	3.51235e-05
SH	bin963	bin2724	-1.19992	9.72086	3.873e-06
SH	bin985	bin1698	-1.03837	7.05874	8.88451e-05
SH	bin992	bin1207	-1.10143	7.69846	4.1033e-05
SH	bin1006	bin2720	-1.31267	11.0177	7.92673e-07
SH	bin1127	bin1913	-1.07567	7.10115	5.82469e-05
SH	bin1146	bin1910	-1.06895	7.07117	6.60839e-05
SH	bin1265	bin1889	-1.1091	8.21612	2.31242e-05
SH	bin1268	bin2766	-1.07987	6.91716	3.51162e-05
SH	bin1268	bin1463	-1.20082	8.93812	7.23188e-06
SH	bin1334	bin2727	-1.00121	6.76537	9.63826e-05
SH	bin1370	bin2747	-1.19915	9.24994	6.42624e-06
SH	bin1371	bin1954	-1.07287	7.83876	4.96098e-05
SH	bin1481	bin1901	-1.1284	7.2013	7.11225e-05
SH	bin1579	bin1861	-1.14084	8.48426	1.60119e-05
SH	bin1590	bin2338	-1.07918	7.53712	5.12246e-05
SH	bin1598	bin2339	-1.19679	8.81519	1.08281e-05
SH	bin1601	bin2105	-1.11471	8.13014	2.549e-05
SH	bin1620	bin2091	-1.19037	8.18957	1.79868e-05
SH	bin1709	bin1901	-1.09432	7.76529	3.92362e-05
SH	bin1783	bin2334	-1.05862	7.04589	9.47609e-05
SH	bin1807	bin1969	-1.09083	7.44088	5.80464e-05
SH	bin1895	bin2618	-1.12365	8.22131	2.05583e-05
SH	bin1896	bin2686	-1.05606	7.32565	6.46505e-05
SH	bin1899	bin2616	-1.0693	7.43549	5.57849e-05
SH	bin1910	bin2730	-1.1629	7.71913	4.11183e-05
SH	bin2155	bin2653	-1.02461	6.88131	8.64466e-05
RDW	bin40	bin1019	-0.787715	8.00804	2.88608e-05
RDW	bin210	bin1434	-0.886465	9.40554	5.085e-06
RDW	bin222	bin917	-0.652299	6.99381	9.5662e-05
RDW	bin225	bin378	-0.704498	7.61528	4.51368e-05
RDW	bin436	bin2726	-0.661908	7.02996	8.56719e-05
RDW	bin905	bin2332	-0.668487	6.97312	9.49198e-05
RDW	bin1020	bin2669	-0.700816	7.36528	5.83815e-05
RDW	bin1030	bin2666	-0.734903	6.96828	9.20228e-05
RDW	bin1084	bin1935	-0.671094	7.02868	8.09632e-05
RDW	bin1096	bin1955	-0.67836	6.82149	9.87187e-05
RDW	bin1135	bin1844	-0.673829	7.29503	6.93262e-05
RDW	bin1241	bin1998	-0.711213	8.10875	2.13669e-05
RDW	bin1262	bin1983	-0.764663	9.52091	3.33307e-06
RDW	bin1263	bin1994	-0.777118	9.51314	3.4721e-06
RDW	bin1283	bin1957	-0.671991	7.2623	5.14317e-05
RDW	bin1404	bin1843	-0.757507	8.98083	8.44591e-06
RDW	bin1448	bin1548	-0.703547	7.08507	8.32183e-05
RDW	bin1928	bin2162	-0.658772	7.04174	9.01162e-05
SLL	bin22	bin2760	0.730459	7.01276	9.85124e-05
SLL	bin33	bin2767	0.796219	7.2219	7.55093e-05
SLL	bin2499	bin2751	-0.693358	7.2219	8.0468e-05
SLL	bin158	bin281	-0.679751	6.77342	9.00354e-05
SLL	bin160	bin2726	-0.683696	6.89808	6.94798e-05
SLL	bin177	bin287	-0.717588	7.47152	3.38571e-05
SLL	bin193	bin2728	-0.676967	6.56616	8.63931e-05
SLL	bin193	bin1209	-0.683995	6.56616	9.9775e-05
SLL	bin245	bin1224	-0.692989	6.93706	9.70505e-05
SLL	bin336	bin644	-0.819454	8.24522	2.1882e-05
SLL	bin355	bin1401	-0.694138	7.00658	7.91494e-05
SLL	bin410	bin1290	-0.68066	6.87655	5.36753e-05
SLL	bin430	bin1300	-0.793677	9.28295	3.84369e-06
SLL	bin463	bin2688	-0.690704	6.81504	9.18507e-05
SLL	bin490	bin1479	0.741962	7.26521	4.83381e-05
SLL	bin560	bin1181	0.732292	6.35307	2.03534e-05
SLL	bin561	bin1492	0.758253	7.02737	7.19448e-05
SLL	bin621	bin2377	0.670304	6.51407	9.82489e-05
SLL	bin643	bin1027	-0.718997	7.1087	8.04447e-05
SLL	bin662	bin1006	-0.776149	8.11676	2.56112e-05
SLL	bin666	bin1785	-0.750878	6.48518	5.5846e-05
SLL	bin667	bin2417	-0.731981	7.42774	4.07727e-05
SLL	bin684	bin1767	-0.92388	8.018	2.19253e-05
SLL	bin983	bin1407	-0.86955	10.9649	6.77212e-07
SLL	bin1029	bin2719	-0.856445	9.80324	2.49727e-06
SLL	bin1409	bin2138	-0.847074	10.1843	1.6381e-06
SLL	bin1539	bin2317	0.700106	6.75534	6.96302e-05
SLL	bin1556	bin1808	0.749999	7.35266	1.66008e-05
SLL	bin1579	bin1859	-0.733253	7.93013	9.58973e-06
SLL	bin1581	bin1827	-0.714481	7.05668	4.56358e-05
SLL	bin1640	bin2151	-0.747363	7.81989	2.53534e-05
SLL	bin1703	bin2152	-0.69946	7.21183	5.47331e-05
SLL	bin1709	bin1910	-0.846425	10.3544	1.33634e-06
SLL	bin1778	bin2728	-0.712057	7.05651	7.22416e-05
SLL	bin1785	bin2668	-0.8182	7.87848	2.93108e-05
SLL	bin1862	bin2174	-0.733001	7.92521	2.24863e-05
SLL	bin1920	bin2216	0.849914	10.6832	9.45688e-07
SLL	bin1927	bin2718	-0.780244	8.74554	9.4168e-06
SLL	bin2019	bin2705	0.699387	6.68445	8.59519e-05
SLL	bin2091	bin2731	-0.721731	6.68445	9.66833e-05
SLL	bin2134	bin2727	-0.693332	6.68445	7.84684e-05
FLSL	bin24	bin2216	-0.27266	8.77583	1.20403e-05
FLSL	bin29	bin2386	0.280717	8.74462	1.16125e-05
FLSL	bin71	bin1714	0.225488	7.12621	8.12111e-05
FLSL	bin2499	bin2751	-0.240562	6.99663	3.32013e-05
FLSL	bin143	bin2469	0.226277	7.07488	6.75984e-05
FLSL	bin150	bin2462	0.231096	7.15194	6.58727e-05
FLSL	bin299	bin1243	0.240743	7.86091	3.28657e-05
FLSL	bin336	bin644	-0.338768	13.5423	3.28325e-08
FLSL	bin336	bin1602	0.235923	7.02322	9.04737e-05
FLSL	bin360	bin1398	-0.234365	7.76357	4.03477e-05
FLSL	bin409	bin1288	-0.228049	7.49325	4.41899e-05
FLSL	bin561	bin846	0.24091	7.9519	2.80819e-05
FLSL	bin579	bin856	0.233626	7.56476	4.09985e-05
FLSL	bin621	bin2378	0.224941	7.04989	7.25989e-05
FLSL	bin684	bin1767	-0.28928	7.55453	4.93474e-05
FLSL	bin912	bin1156	0.228599	7.29648	5.79591e-05
FLSL	bin929	bin1062	-0.225716	7.13341	8.20051e-05
FLSL	bin983	bin1406	-0.249381	8.66717	1.3586e-05
FLSL	bin1029	bin2719	-0.242874	7.57652	4.97306e-05
FLSL	bin1128	bin1813	-0.224621	7.10391	8.15756e-05
FLSL	bin1152	bin2602	0.235267	7.23392	5.11904e-05
FLSL	bin1368	bin2745	-0.237966	7.87834	3.52398e-05
FLSL	bin1408	bin2137	-0.254653	8.95473	9.23888e-06
FLSL	bin1409	bin2135	-0.255374	9.01109	8.68924e-06
FLSL	bin1410	bin1778	-0.229637	7.3469	6.36513e-05
FLSL	bin1412	bin1779	-0.234236	7.53704	5.1481e-05
FLSL	bin1735	bin1899	-0.259102	6.72416	5.65e-06
FLSL	bin1776	bin1968	-0.236926	6.72416	2.95304e-05
FLSL	bin1845	bin2745	-0.244912	6.72416	2.90248e-05
FLSL	bin1916	bin2218	0.247132	6.72416	1.46435e-05
FLSL	bin1927	bin2718	-0.251514	6.72416	1.24249e-05
SDW	bin2326	bin2592	1.65552	6.70376	7.74134e-07
SDW	bin46	bin1889	-1.35578	8.23809	1.57541e-05
SDW	bin47	bin1903	-1.27501	7.43485	4.34248e-05
SDW	bin85	bin431	-1.20078	6.62233	7.86413e-05
SDW	bin86	bin1299	-1.22134	7.2099	3.00279e-05
SDW	bin87	bin1302	-1.17371	6.74501	6.3332e-05
SDW	bin2417	bin2460	-1.53075	6.74501	2.94995e-05
SDW	bin2422	bin2708	-1.18169	6.74501	6.58793e-05
SDW	bin189	bin290	-1.27247	7.21765	4.70257e-05
SDW	bin200	bin1269	-1.28288	8.0085	2.30511e-05
SDW	bin207	bin438	-1.32363	8.45925	1.22036e-05
SDW	bin208	bin439	-1.33722	8.67129	9.70031e-06
SDW	bin229	bin1212	-1.36127	8.52168	1.51524e-05
SDW	bin230	bin1208	-1.35071	8.59592	1.22275e-05
SDW	bin242	bin1213	-1.32462	8.18139	2.26596e-05
SDW	bin243	bin1224	-1.30977	8.20901	2.21e-05
SDW	bin274	bin435	-1.22427	7.2571	6.06778e-05
SDW	bin279	bin1203	-1.32741	8.79041	1.05484e-05
SDW	bin283	bin610	-1.28699	8.17628	2.29119e-05
SDW	bin283	bin1318	-1.25631	7.45512	3.31075e-05
SDW	bin343	bin1681	-1.25941	7.10415	7.94559e-05
SDW	bin344	bin1271	-1.27088	6.99283	8.66385e-05
SDW	bin427	bin1953	-1.19694	6.89269	8.55945e-05
SDW	bin435	bin756	-1.42067	7.55683	2.66731e-05
SDW	bin435	bin852	-1.41977	9.85764	1.46694e-06
SDW	bin435	bin1801	-1.3002	7.87122	2.53088e-05
SDW	bin437	bin708	-1.24958	7.78287	3.52988e-05
SDW	bin437	bin778	-1.39673	9.23392	3.44938e-06
SDW	bin439	bin1803	-1.38468	9.10496	6.47629e-06
SDW	bin439	bin1824	-1.26646	6.57768	2.64616e-05
SDW	bin464	bin2710	-1.4185	7.38669	1.87846e-06
SDW	bin474	bin2725	-1.26563	8.0588	2.078e-05
SDW	bin675	bin1309	-1.29724	7.21235	4.55023e-05
SDW	bin680	bin2495	-1.57021	6.67775	6.69985e-06
SDW	bin680	bin1911	-1.30329	7.2756	9.41995e-05
SDW	bin694	bin902	1.42583	7.15611	6.46763e-05
SDW	bin841	bin2310	-1.29213	7.21346	7.1028e-05
SDW	bin982	bin2750	-1.2222	7.43935	4.89973e-05
SDW	bin996	bin2753	-1.24115	7.10747	7.42954e-05
SDW	bin1032	bin2463	-1.48125	8.81409	8.97901e-06
SDW	bin1150	bin1912	-1.51163	10.5711	9.08982e-07
SDW	bin1164	bin2309	-1.20974	7.21145	6.95933e-05
SDW	bin1195	bin1953	-1.20748	7.34011	5.28048e-05
SDW	bin1213	bin1956	-1.17575	6.94239	7.99587e-05
SDW	bin1214	bin1957	-1.18894	7.05058	5.99023e-05
SDW	bin1275	bin1993	-1.1828	7.05319	5.69406e-05
SDW	bin1299	bin1457	-1.36512	8.3611	1.23915e-05
SDW	bin1305	bin1680	-1.34074	8.76348	7.4962e-06
SDW	bin1370	bin1470	-1.27558	7.61602	3.804e-05
SDW	bin1559	bin2049	-1.24275	6.81421	8.62764e-05
SDW	bin1580	bin2413	-1.35819	8.27106	1.37524e-05
SDW	bin1705	bin2496	-1.22685	7.52108	3.6933e-05
SDW	bin1778	bin2406	-1.27589	7.68545	3.40516e-05
SDW	bin1862	bin2161	-1.23214	7.47574	3.10959e-05
SDW	bin1954	bin2740	-1.21584	6.54722	7.68573e-05
SDW	bin2074	bin2748	-1.22374	6.54722	7.6578e-05
SDW	bin2139	bin2449	-1.32941	6.54722	1.41825e-05

## Sheet: LD_Ex2
Table S6. Two-locus combinations showing significant epistatic effects under LD. LD, low density; MD, medium density; HD, high density; SH, seedling height; FLSL, first leaf sheath length; FLL, first leaf length; SLL, second leaf length; SDW, shoot dry weight; RDW, root dry weight. Var, the percentage (%) of variation explained by the interaction.
Trait	Locus_1	Locus_2	Epistasis_effect	Var	p_value
FLL	bin4	bin1443	0.258479	7.35461	5.23248e-05
FLL	bin2318	bin2364	0.229271	5.38916	9.24356e-05
FLL	bin71	bin1890	-0.225526	6.63305	9.91907e-05
FLL	bin72	bin408	-0.24139	7.1441	3.57975e-05
FLL	bin86	bin1029	-0.262124	8.02923	1.6064e-05
FLL	bin87	bin955	-0.24013	7.67116	2.85281e-05
FLL	bin128	bin1600	-0.242934	6.76133	8.38792e-05
FLL	bin2624	bin2672	0.388357	6.23208	9.69038e-05
FLL	bin145	bin1774	-0.257662	7.76516	9.32212e-06
FLL	bin231	bin325	-0.246259	5.81395	3.86354e-05
FLL	bin232	bin1375	-0.231835	6.39331	4.16781e-05
FLL	bin271	bin2269	-0.277951	4.81801	9.31996e-07
FLL	bin271	bin1994	-0.324312	4.74568	1.30872e-08
FLL	bin286	bin344	-0.26793	7.8456	1.62151e-05
FLL	bin309	bin876	-0.288198	8.71912	1.04256e-05
FLL	bin319	bin659	-0.289602	9.03099	6.42348e-06
FLL	bin338	bin661	-0.283965	7.66363	3.24868e-05
FLL	bin374	bin2751	-0.234809	6.97669	7.14821e-05
FLL	bin378	bin2139	-0.220232	6.20758	7.22999e-05
FLL	bin482	bin2482	-0.230983	6.637	6.95182e-05
FLL	bin482	bin1098	-0.246839	5.55359	1.94294e-05
FLL	bin590	bin2642	-0.232328	6.88476	5.34984e-05
FLL	bin656	bin2695	-0.234262	6.47194	9.03247e-05
FLL	bin657	bin1011	-0.286815	9.54978	3.82377e-06
FLL	bin685	bin1765	-0.31393	8.67219	4.04709e-06
FLL	bin775	bin2499	-0.24951	7.06832	5.76607e-05
FLL	bin901	bin1043	0.250575	7.51634	3.70482e-05
FLL	bin934	bin1103	-0.246109	7.80126	3.75595e-05
FLL	bin955	bin1419	-0.249614	7.95927	2.80132e-05
FLL	bin1008	bin2011	-0.259981	8.12396	2.62976e-05
FLL	bin1055	bin1393	-0.255657	7.88963	3.16161e-05
FLL	bin1083	bin1812	-0.268157	8.5386	1.45271e-05
FLL	bin1189	bin1446	0.266921	8.26197	1.71052e-05
FLL	bin1265	bin2315	0.267482	9.23849	4.56588e-06
FLL	bin1392	bin2406	-0.246748	7.87761	1.46946e-05
FLL	bin1392	bin1734	-0.294349	10.4592	7.25236e-07
FLL	bin1419	bin1680	-0.245871	7.7014	3.75982e-05
FLL	bin1419	bin1757	-0.234358	6.9069	5.33045e-05
FLL	bin1709	bin1919	-0.262468	8.80104	9.24955e-06
FLL	bin1715	bin2002	-0.332121	14.0921	1.67626e-08
FLL	bin1766	bin1994	-0.232695	6.94964	4.22215e-05
FLL	bin1785	bin2624	-0.250604	7.67584	1.37455e-05
FLL	bin1893	bin2116	0.22817	6.72746	8.54057e-05
FLL	bin1935	bin2111	0.231617	7.02832	5.8784e-05
SH	bin88	bin1261	-0.713716	8.78884	1.14005e-05
SH	bin94	bin525	-0.673362	7.18144	7.95658e-05
SH	bin120	bin139	-1.57871	7.40669	5.99073e-05
SH	bin132	bin2742	-0.680373	7.99093	2.97334e-05
SH	bin182	bin1206	-0.69214	8.03408	2.64181e-05
SH	bin212	bin615	-0.641768	7.0269	9.50017e-05
SH	bin254	bin2276	-0.704916	8.7941	1.00191e-05
SH	bin269	bin1810	-0.638312	6.73331	8.84046e-05
SH	bin273	bin2640	-0.631391	7.0043	6.26449e-05
SH	bin344	bin2642	-0.677076	7.25161	4.69083e-05
SH	bin406	bin1811	-0.65462	6.96423	7.41467e-05
SH	bin421	bin2399	-0.640289	7.08761	7.83098e-05
SH	bin422	bin2399	-0.640289	7.08761	7.83098e-05
SH	bin424	bin1033	-0.673127	6.9748	8.7253e-05
SH	bin536	bin2672	-0.703617	8.91244	7.4839e-06
SH	bin615	bin2479	-0.724321	8.89336	9.90895e-06
SH	bin615	bin1833	-0.76026	8.94128	9.72717e-06
SH	bin658	bin1033	-0.801368	8.63623	1.42671e-05
SH	bin962	bin1196	-0.687442	8.59759	1.40825e-05
SH	bin975	bin2742	-0.701778	8.95716	9.02435e-06
SH	bin1035	bin1199	-0.663122	7.38495	6.29042e-05
SH	bin1261	bin2689	-0.695054	8.05899	1.96559e-05
SH	bin1268	bin2735	-0.68782	8.36821	1.852e-05
SH	bin1281	bin2748	-0.614576	6.85743	9.32142e-05
SH	bin1489	bin2268	-0.721882	7.56796	4.82051e-05
SH	bin1601	bin2105	-0.743564	9.75446	3.53489e-06
SH	bin1670	bin1898	-0.672633	8.12211	2.32167e-05
SH	bin1801	bin1975	-0.698741	8.03261	2.16189e-05
SH	bin1823	bin2317	-0.760017	10.1026	2.22537e-06
SH	bin1896	bin2760	-0.674998	7.41873	5.58284e-05
SH	bin1913	bin2772	-0.772345	10.1685	1.6582e-06
SH	bin2046	bin2750	-0.752812	9.38408	3.65259e-06
SH	bin2152	bin2644	-0.645786	7.46901	4.74037e-05
RDW	bin271	bin623	-0.614975	7.00218	6.35965e-05
RDW	bin321	bin637	-0.690881	7.5815	4.37398e-05
RDW	bin329	bin2164	-0.662638	7.28482	6.51868e-05
RDW	bin341	bin1452	-0.700898	7.0142	8.0869e-05
RDW	bin589	bin2156	-0.790457	10.6514	9.94825e-07
RDW	bin720	bin2195	0.657065	6.9677	8.52765e-05
SLL	bin50	bin1905	-0.511632	9.67996	3.19521e-06
SLL	bin53	bin1961	-0.524712	10.6508	9.95134e-07
SLL	bin85	bin1029	-0.475121	8.05882	2.25722e-05
SLL	bin86	bin347	-0.439365	7.51701	4.4044e-05
SLL	bin174	bin645	-0.482412	9.09663	5.51042e-06
SLL	bin175	bin1224	-0.431554	7.22109	5.45297e-05
SLL	bin193	bin2687	-0.445748	6.60803	8.52078e-05
SLL	bin198	bin1201	-0.478087	8.52966	7.82595e-06
SLL	bin205	bin2174	-0.424997	6.93761	5.9667e-05
SLL	bin222	bin1048	-0.431023	7.3633	4.60811e-05
SLL	bin261	bin1870	-0.4228	7.07884	8.65437e-05
SLL	bin270	bin2270	-0.525578	11.3863	4.16933e-07
SLL	bin272	bin1994	-0.495732	9.69964	3.54705e-06
SLL	bin274	bin1922	-0.445997	7.36956	6.12612e-05
SLL	bin285	bin1974	-0.511606	9.91278	3.05512e-06
SLL	bin290	bin1975	-0.509375	9.61454	4.40052e-06
SLL	bin375	bin2753	-0.448115	7.55815	4.61511e-05
SLL	bin425	bin1079	-0.507865	9.92307	2.72346e-06
SLL	bin482	bin1919	-0.462876	8.45184	1.33868e-05
SLL	bin578	bin2640	-0.438922	7.91572	1.88621e-05
SLL	bin680	bin1073	-0.474027	7.03808	8.72013e-05
SLL	bin687	bin1753	-0.520388	7.70745	3.98907e-05
SLL	bin958	bin1403	-0.481986	9.24973	6.08692e-06
SLL	bin959	bin1196	-0.461594	8.785	1.08741e-05
SLL	bin1000	bin2745	-0.472898	8.72405	1.22601e-05
SLL	bin1029	bin2689	-0.465658	7.32112	6.14812e-05
SLL	bin1030	bin1403	-0.520132	9.82036	2.77326e-06
SLL	bin1039	bin1201	-0.451334	7.76308	3.58459e-05
SLL	bin1046	bin1205	-0.456152	7.95654	2.69369e-05
SLL	bin1071	bin1817	-0.429674	7.25083	7.10214e-05
SLL	bin1207	bin1865	-0.518848	10.8316	8.92801e-07
SLL	bin1212	bin1269	-0.462028	7.47505	4.53567e-05
SLL	bin1226	bin2412	-0.410501	6.82289	6.83269e-05
SLL	bin1392	bin1731	-0.434068	7.06555	8.78356e-05
SLL	bin1577	bin2698	-0.404857	6.27066	9.95143e-05
SLL	bin1580	bin2573	0.92212	6.82373	7.37554e-05
SLL	bin1709	bin1912	-0.557926	12.1959	1.79456e-07
SLL	bin1715	bin2003	-0.479054	9.0978	7.15927e-06
SLL	bin1777	bin2747	-0.43697	7.43048	4.48965e-05
SLL	bin1824	bin2399	-0.444527	7.76491	3.56875e-05
SLL	bin2066	bin2746	-0.452583	7.81451	3.3396e-05
FLSL	bin13	bin2206	-0.176304	9.62811	3.60884e-06
FLSL	bin53	bin1961	-0.225116	15.8993	1.10404e-09
FLSL	bin69	bin2198	-0.168974	8.81563	1.04847e-05
FLSL	bin69	bin1393	-0.190401	11.1989	5.55533e-07
FLSL	bin174	bin644	-0.152731	7.39481	5.42491e-05
FLSL	bin184	bin1204	-0.195604	11.2866	4.04337e-07
FLSL	bin193	bin1190	-0.166193	8.63928	1.15367e-05
FLSL	bin194	bin2687	-0.170548	7.69627	2.41086e-05
FLSL	bin205	bin1640	-0.189225	10.717	1.05559e-06
FLSL	bin205	bin2174	-0.163276	8.30442	1.88117e-05
FLSL	bin209	bin615	-0.157877	7.68921	3.98264e-05
FLSL	bin249	bin328	-0.162754	7.46298	3.26551e-05
FLSL	bin249	bin1076	-0.153954	7.58747	4.90942e-05
FLSL	bin250	bin2127	-0.153805	7.38119	5.3614e-05
FLSL	bin254	bin2637	-0.171367	8.84905	9.03596e-06
FLSL	bin262	bin1816	-0.152481	7.4671	5.41691e-05
FLSL	bin262	bin1992	-0.164425	8.80712	9.9765e-06
FLSL	bin268	bin1169	-0.151101	7.42288	5.3371e-05
FLSL	bin270	bin2270	-0.18055	10.8976	5.6875e-07
FLSL	bin285	bin1964	-0.162474	7.86256	2.70588e-05
FLSL	bin286	bin2688	-0.166378	8.66003	1.08479e-05
FLSL	bin301	bin1593	-0.180053	8.58465	6.96694e-06
FLSL	bin324	bin657	-0.163967	6.63188	8.48977e-05
FLSL	bin399	bin1071	-0.160323	8.38173	1.74452e-05
FLSL	bin400	bin1138	-0.156077	7.93617	2.94256e-05
FLSL	bin423	bin2399	-0.161379	8.27453	2.172e-05
FLSL	bin425	bin2445	-0.152819	7.64309	3.86609e-05
FLSL	bin425	bin1034	-0.162915	7.33893	6.58614e-05
FLSL	bin425	bin2163	-0.150247	7.49817	4.54434e-05
FLSL	bin429	bin2444	-0.154434	7.82732	3.01847e-05
FLSL	bin480	bin1941	-0.152208	7.50628	4.89866e-05
FLSL	bin595	bin2671	-0.158369	7.79176	2.63151e-05
FLSL	bin632	bin2167	0.159155	7.78283	3.0276e-05
FLSL	bin659	bin1033	-0.176902	7.87368	3.49477e-05
FLSL	bin667	bin1599	-0.160217	7.45208	5.61126e-05
FLSL	bin715	bin2689	-0.161502	7.28609	6.17738e-05
FLSL	bin785	bin1918	-0.172009	8.5819	1.05014e-05
FLSL	bin844	bin2361	-0.152873	6.93165	7.83253e-05
FLSL	bin908	bin2680	-0.154566	7.80403	3.02362e-05
FLSL	bin942	bin1600	-0.168804	8.56012	1.46461e-05
FLSL	bin962	bin1196	-0.149613	7.43375	5.90264e-05
FLSL	bin983	bin2744	-0.169217	9.45543	4.44258e-06
FLSL	bin996	bin1225	-0.155505	7.65858	4.21012e-05
FLSL	bin1001	bin1657	-0.156716	7.64743	4.56313e-05
FLSL	bin1006	bin2748	-0.163383	8.14196	1.80477e-05
FLSL	bin1007	bin1659	-0.160405	7.70962	4.25645e-05
FLSL	bin1011	bin2727	-0.178662	9.65803	4.14563e-06
FLSL	bin1028	bin1404	-0.177106	9.40997	5.4333e-06
FLSL	bin1033	bin1188	-0.18	9.36576	5.93109e-06
FLSL	bin1046	bin1205	-0.171456	9.11671	7.59046e-06
FLSL	bin1062	bin1817	-0.160178	8.00824	2.96714e-05
FLSL	bin1071	bin2619	-0.153122	7.26338	6.05116e-05
FLSL	bin1096	bin1207	-0.171231	9.41193	5.42537e-06
FLSL	bin1118	bin1203	-0.160776	7.97487	2.98756e-05
FLSL	bin1141	bin2696	-0.160552	8.28932	1.88641e-05
FLSL	bin1174	bin2679	-0.158598	7.91493	1.30232e-05
FLSL	bin1182	bin2674	-0.178601	10.1814	1.57925e-06
FLSL	bin1186	bin2171	-0.176398	10.0899	2.23264e-06
FLSL	bin1207	bin1269	-0.182023	10.1096	1.99876e-06
FLSL	bin1208	bin1865	-0.193408	12.212	1.66586e-07
FLSL	bin1269	bin2691	-0.149039	7.10562	7.4089e-05
FLSL	bin1364	bin2691	-0.159205	7.80251	2.9583e-05
FLSL	bin1456	bin1903	-0.161813	7.81453	2.96699e-05
FLSL	bin1571	bin2680	-0.153891	7.15497	5.25697e-05
FLSL	bin1601	bin2108	-0.154116	7.66739	4.17003e-05
FLSL	bin1671	bin1898	-0.168719	9.32844	5.05186e-06
FLSL	bin1682	bin2003	-0.150492	7.38637	5.45871e-05
FLSL	bin1707	bin1918	-0.172477	9.52999	3.91107e-06
FLSL	bin1735	bin1901	-0.177774	9.97839	2.25974e-06
FLSL	bin1748	bin2628	-0.159062	7.82847	3.16262e-05
FLSL	bin1772	bin1961	-0.151353	7.44509	4.37491e-05
FLSL	bin1823	bin2341	-0.166634	8.72628	1.11252e-05
FLSL	bin1880	bin2680	-0.165904	8.88122	7.62905e-06
FLSL	bin1886	bin2619	-0.187499	11.4423	3.617e-07
FLSL	bin1892	bin2691	-0.167481	9.18083	6.82678e-06
FLSL	bin1900	bin2171	-0.150486	7.29965	5.35501e-05
FLSL	bin1901	bin2617	-0.15745	7.88308	2.90097e-05
FLSL	bin1950	bin2608	-0.172379	9.21742	5.27225e-06
FLSL	bin2073	bin2676	-0.192106	10.8307	7.97851e-07
SDW	bin53	bin2630	-1.66513	12.2376	1.4623e-07
SDW	bin65	bin514	1.25952	7.06278	9.14622e-05
SDW	bin68	bin2023	1.32422	7.74876	3.96766e-05
SDW	bin108	bin906	1.22353	7.20328	7.40149e-05
SDW	bin169	bin2557	-1.37638	8.81255	1.10275e-05
SDW	bin171	bin1207	-1.28641	7.64708	3.44608e-05
SDW	bin274	bin1802	-1.48196	8.69022	1.0787e-05
SDW	bin349	bin744	1.60945	7.20282	7.79408e-05
SDW	bin613	bin2452	-1.3059	7.80225	3.67188e-05
SDW	bin618	bin1377	-1.23073	7.23855	7.44972e-05
SDW	bin858	bin2305	-1.23244	7.09127	8.33994e-05
SDW	bin918	bin2312	1.28883	7.81069	3.66311e-05
SDW	bin1051	bin2743	-1.30082	7.28611	6.87269e-05
SDW	bin1051	bin1233	-1.37736	8.22485	2.17606e-05
SDW	bin1277	bin2745	-1.40225	9.63158	4.13795e-06
SDW	bin1347	bin2744	-1.27929	7.73635	4.07198e-05
SDW	bin1391	bin1576	1.27006	7.52026	4.92627e-05
SDW	bin1461	bin2233	-1.33852	7.78117	3.77487e-05
SDW	bin1620	bin2093	-1.54303	10.1842	2.00418e-06
SDW	bin1649	bin2435	-1.37212	8.25198	2.1236e-05
SDW	bin2069	bin2407	-1.24641	7.11528	6.46205e-05

## Sheet: MD_Ex2
Table S6. Two-locus combinations showing significant epistatic effects under MD. LD, low density; MD, medium density; HD, high density; SH, seedling height; FLSL, first leaf sheath length; FLL, first leaf length; SLL, second leaf length; SDW, shoot dry weight; RDW, root dry weight. Var, the percentage (%) of variation explained by the interaction.
Trait	Locus_1	Locus_2	Epistasis_effect	Var	p_value
FLL	bin4	bin87	0.265189	8.0196	1.9096e-05
FLL	bin4	bin1443	0.279681	7.48319	4.56071e-05
FLL	bin2322	bin2593	0.27555	6.98245	7.38613e-05
FLL	bin20	bin1442	0.284127	6.93618	8.59238e-05
FLL	bin72	bin404	-0.255959	6.93853	4.99251e-05
FLL	bin282	bin1994	-0.273037	8.24272	9.20493e-06
FLL	bin288	bin2364	0.256387	7.00942	4.94564e-05
FLL	bin291	bin1975	-0.266808	7.32059	4.28393e-05
FLL	bin309	bin876	-0.290581	7.70331	3.34702e-05
FLL	bin378	bin2139	-0.230759	5.92287	9.52947e-05
FLL	bin477	bin1098	-0.24055	6.57781	8.25537e-05
FLL	bin565	bin1556	0.274141	8.15479	4.78275e-06
FLL	bin614	bin2579	0.394985	7.08922	5.96749e-05
FLL	bin657	bin1010	-0.275179	7.75035	2.97876e-05
FLL	bin685	bin1765	-0.333155	8.48808	6.84862e-06
FLL	bin686	bin2432	-0.283392	7.2121	3.71765e-05
FLL	bin957	bin1403	-0.257263	7.40235	4.44139e-05
FLL	bin1083	bin1812	-0.274979	7.80293	3.53666e-05
FLL	bin1212	bin1512	0.278622	6.63379	8.14476e-05
FLL	bin1370	bin1468	-0.256483	6.87581	9.03452e-05
FLL	bin1392	bin1734	-0.308437	9.98076	1.55412e-06
FLL	bin1415	bin1681	-0.269913	8.13015	2.33608e-05
FLL	bin1709	bin1913	-0.264351	7.67722	3.55755e-05
FLL	bin1723	bin2003	-0.322026	11.3693	4.62888e-07
FLL	bin1844	bin2188	-0.239506	6.6112	5.13127e-05
SH	bin2314	bin2564	-0.676904	8.73087	1.23745e-05
SH	bin64	bin1962	-0.651992	7.83169	2.82648e-05
SH	bin88	bin1263	-0.658667	8.11866	2.36604e-05
SH	bin98	bin525	-0.638366	7.00495	9.54177e-05
SH	bin120	bin139	-1.49937	7.17992	7.82823e-05
SH	bin2592	bin2643	-0.723504	7.43078	4.81023e-05
SH	bin146	bin2562	-0.683702	8.16262	2.14623e-05
SH	bin254	bin2276	-0.668137	8.49047	1.45936e-05
SH	bin258	bin614	-0.610887	7.06821	7.86362e-05
SH	bin270	bin2637	-0.641854	7.65143	2.55182e-05
SH	bin271	bin2271	-0.643824	8.11701	1.49255e-05
SH	bin344	bin1671	-0.63746	6.94581	6.05037e-05
SH	bin410	bin2313	-0.665568	8.60054	1.03369e-05
SH	bin486	bin1962	-0.669228	8.62386	1.06782e-05
SH	bin533	bin1605	-0.632323	7.41209	5.94418e-05
SH	bin612	bin2479	-0.647186	7.53678	5.08242e-05
SH	bin615	bin1833	-0.817953	11.1229	7.02352e-07
SH	bin641	bin1225	-0.634255	7.10088	7.51396e-05
SH	bin658	bin1033	-0.788735	8.991	9.24239e-06
SH	bin975	bin2318	-0.621526	7.48505	5.53753e-05
SH	bin984	bin2727	-0.738717	10.5745	1.36225e-06
SH	bin1027	bin1403	-0.687476	8.41829	1.80785e-05
SH	bin1051	bin1280	-0.65571	7.50461	5.40578e-05
SH	bin1211	bin1867	-0.598446	6.88344	9.12786e-05
SH	bin1263	bin2689	-0.647826	7.64727	3.18987e-05
SH	bin1268	bin2745	-0.601479	7.05146	8.50067e-05
SH	bin1280	bin1690	-0.603071	6.97583	9.3331e-05
SH	bin1464	bin2085	-0.69353	8.22546	2.15897e-05
SH	bin1510	bin2081	-0.691411	8.12733	2.49193e-05
SH	bin1601	bin2105	-0.817362	12.6672	9.55524e-08
SH	bin1639	bin2086	-0.714077	8.75207	1.05899e-05
SH	bin1671	bin1898	-0.696306	9.35401	4.85109e-06
SH	bin1735	bin1903	-0.656378	8.00851	2.3341e-05
SH	bin1746	bin1949	-0.699708	9.09025	5.02608e-06
SH	bin1801	bin1969	-0.699677	8.61187	8.70746e-06
SH	bin1811	bin1916	-0.680724	8.32525	1.64272e-05
SH	bin1824	bin2331	-0.626116	7.35742	5.95929e-05
SH	bin1914	bin2777	-0.654931	7.85352	2.7911e-05
SH	bin1949	bin2600	-0.621262	6.96152	7.47085e-05
SH	bin2046	bin2750	-0.715055	9.09875	4.95313e-06
SH	bin2067	bin2744	-0.693217	8.9659	7.84085e-06
RDW	bin420	bin1208	-0.580136	7.08937	8.89168e-05
RDW	bin589	bin2156	-0.633851	8.06842	2.55995e-05
RDW	bin1452	bin2152	-0.629358	8.15278	2.42892e-05
SLL	bin50	bin1904	-0.617943	11.8016	1.95513e-07
SLL	bin53	bin1961	-0.520998	8.72866	9.24206e-06
SLL	bin58	bin1004	-0.467673	6.93471	8.23108e-05
SLL	bin82	bin987	-0.489152	6.99024	6.4624e-05
SLL	bin85	bin1011	-0.483957	7.21572	6.05447e-05
SLL	bin91	bin1150	-0.475086	7.07679	5.6677e-05
SLL	bin2405	bin2708	-0.471406	7.53092	3.86727e-05
SLL	bin174	bin645	-0.491141	7.8378	2.22783e-05
SLL	bin186	bin2742	-0.46085	6.91591	5.6504e-05
SLL	bin193	bin2687	-0.54562	8.2302	9.35883e-06
SLL	bin205	bin1640	-0.463957	6.60359	8.89026e-05
SLL	bin206	bin1398	-0.461071	6.74384	7.41846e-05
SLL	bin209	bin2174	-0.481239	7.41498	2.88861e-05
SLL	bin220	bin1865	-0.491563	7.70375	2.86167e-05
SLL	bin253	bin1031	-0.539269	7.47757	4.61617e-05
SLL	bin254	bin1375	-0.455415	6.91694	9.7352e-05
SLL	bin268	bin1983	-0.514394	8.70522	1.27229e-05
SLL	bin274	bin1922	-0.520343	8.33864	1.92713e-05
SLL	bin285	bin1962	-0.566137	9.90217	3.09358e-06
SLL	bin290	bin1975	-0.572615	10.0998	2.44404e-06
SLL	bin307	bin1011	-0.482327	6.90973	9.08779e-05
SLL	bin341	bin1007	-0.50881	7.84402	3.65793e-05
SLL	bin342	bin1698	-0.500703	7.18838	7.81234e-05
SLL	bin344	bin2430	-0.502581	7.95097	2.59804e-05
SLL	bin426	bin1077	-0.540381	9.32816	5.55779e-06
SLL	bin482	bin1905	-0.509309	8.43043	1.41989e-05
SLL	bin658	bin1007	-0.559664	9.53613	4.33078e-06
SLL	bin680	bin1074	-0.521317	7.02975	7.96321e-05
SLL	bin687	bin1754	-0.560729	7.38414	5.65882e-05
SLL	bin737	bin1292	-0.513759	6.96235	5.62281e-05
SLL	bin955	bin1668	-0.455891	7.05889	7.82748e-05
SLL	bin958	bin1403	-0.564569	10.5495	9.73802e-07
SLL	bin959	bin1196	-0.549541	10.3504	1.25873e-06
SLL	bin986	bin2727	-0.613582	12.4728	9.38124e-08
SLL	bin1000	bin2745	-0.583218	11.0302	6.88424e-07
SLL	bin1005	bin1225	-0.490844	7.76722	3.77442e-05
SLL	bin1007	bin2747	-0.584976	10.8422	9.37702e-07
SLL	bin1030	bin1404	-0.607271	11.1276	4.79006e-07
SLL	bin1038	bin1197	-0.510806	8.2929	1.82304e-05
SLL	bin1075	bin1813	-0.507205	8.04871	2.67632e-05
SLL	bin1112	bin1226	-0.472403	7.14981	7.61515e-05
SLL	bin1133	bin1823	-0.466764	7.2576	5.7118e-05
SLL	bin1195	bin1281	-0.52687	9.15091	5.3182e-06
SLL	bin1204	bin1869	-0.566549	10.7572	8.05583e-07
SLL	bin1206	bin2124	-0.466546	7.20778	4.35149e-05
SLL	bin1212	bin1269	-0.48396	6.81762	8.80987e-05
SLL	bin1221	bin2187	-0.494049	8.04003	2.27753e-05
SLL	bin1226	bin2410	-0.535111	9.63749	2.34194e-06
SLL	bin1226	bin2412	-0.535111	9.63749	2.34194e-06
SLL	bin1226	bin1787	-0.573098	9.71843	2.46986e-06
SLL	bin1335	bin1823	-0.54971	10.0431	2.12593e-06
SLL	bin1375	bin1679	-0.462691	7.16821	7.98087e-05
SLL	bin1392	bin1728	-0.506736	8.0945	2.66035e-05
SLL	bin1456	bin1900	-0.513294	8.05621	2.52616e-05
SLL	bin1587	bin2684	-0.505509	7.86121	2.03696e-05
SLL	bin1601	bin2480	-0.474581	7.33146	5.50687e-05
SLL	bin1671	bin1912	-0.69611	16.0136	1.55175e-09
SLL	bin1709	bin1910	-0.690842	15.4667	3.0115e-09
SLL	bin1722	bin2003	-0.575734	10.7919	9.85436e-07
SLL	bin1777	bin2747	-0.474771	7.29152	5.06198e-05
SLL	bin1824	bin2404	-0.535655	9.28772	4.36239e-06
SLL	bin1824	bin2189	-0.495902	8.12989	2.05544e-05
SLL	bin1832	bin2421	-0.488693	7.40975	4.15331e-05
SLL	bin1886	bin2596	-0.514017	7.85208	2.44339e-05
SLL	bin1896	bin2687	-0.5543	10.227	1.93238e-06
SLL	bin1899	bin2171	-0.49105	8.04657	2.32165e-05
SLL	bin1950	bin2599	-0.574771	10.4472	9.79347e-07
SLL	bin2082	bin2674	-0.47519	7.04173	9.44377e-05
FLSL	bin13	bin2250	-0.17689	7.34959	5.69607e-05
FLSL	bin50	bin1950	-0.260819	15.2942	2.15468e-09
FLSL	bin53	bin1961	-0.269869	17.1658	2.18719e-10
FLSL	bin64	bin801	-0.179788	7.54015	5.00436e-05
FLSL	bin66	bin254	-0.194802	9.12093	7.92214e-06
FLSL	bin67	bin1393	-0.171935	6.98897	9.11866e-05
FLSL	bin67	bin1820	-0.203612	9.82445	3.11114e-06
FLSL	bin88	bin256	-0.191586	8.86268	1.02624e-05
FLSL	bin88	bin1232	-0.175654	7.14121	8.43669e-05
FLSL	bin91	bin798	-0.178719	7.84528	3.49623e-05
FLSL	bin2437	bin2674	-0.169164	6.9046	8.75358e-05
FLSL	bin2437	bin2675	-0.169164	6.9046	8.75358e-05
FLSL	bin173	bin646	-0.183014	8.11666	2.34134e-05
FLSL	bin185	bin1225	-0.184034	7.60277	4.21853e-05
FLSL	bin185	bin1458	-0.188888	7.33279	6.24366e-05
FLSL	bin187	bin253	-0.184817	7.69557	4.19861e-05
FLSL	bin193	bin2687	-0.233395	11.0382	4.41051e-07
FLSL	bin198	bin1190	-0.180829	7.62183	3.69527e-05
FLSL	bin203	bin1481	-0.186565	7.11071	8.59669e-05
FLSL	bin203	bin1640	-0.234401	12.3545	1.49862e-07
FLSL	bin203	bin2171	-0.179556	7.57683	4.78565e-05
FLSL	bin204	bin1481	-0.186565	7.11071	8.59669e-05
FLSL	bin253	bin2653	-0.200598	9.37254	5.54339e-06
FLSL	bin255	bin327	-0.212803	9.18409	3.51624e-06
FLSL	bin257	bin1030	-0.200519	8.46125	1.6141e-05
FLSL	bin259	bin2126	-0.17893	7.68611	3.52735e-05
FLSL	bin261	bin1987	-0.174042	7.41301	5.44457e-05
FLSL	bin268	bin2270	-0.17619	7.80895	2.31169e-05
FLSL	bin268	bin1994	-0.174579	7.46663	4.40584e-05
FLSL	bin285	bin1076	-0.173106	7.17912	6.38281e-05
FLSL	bin285	bin1962	-0.187878	7.99327	2.16245e-05
FLSL	bin324	bin657	-0.196819	7.1788	3.80224e-05
FLSL	bin394	bin1138	-0.199027	9.51057	3.65055e-06
FLSL	bin400	bin1071	-0.175651	7.57204	4.26482e-05
FLSL	bin408	bin1142	-0.194725	9.32999	5.5339e-06
FLSL	bin424	bin1039	-0.176987	7.02109	8.74764e-05
FLSL	bin425	bin2445	-0.182675	8.20476	2.08129e-05
FLSL	bin425	bin1037	-0.184729	7.34786	5.5109e-05
FLSL	bin481	bin1941	-0.171875	7.19067	6.97954e-05
FLSL	bin482	bin1901	-0.17275	7.13698	7.25745e-05
FLSL	bin534	bin2672	-0.175311	7.56039	4.63299e-05
FLSL	bin536	bin2680	-0.173995	7.4908	4.48944e-05
FLSL	bin623	bin1034	-0.178123	7.28511	6.91123e-05
FLSL	bin657	bin2479	-0.18563	7.52656	5.10499e-05
FLSL	bin658	bin1033	-0.213393	8.39804	1.772e-05
FLSL	bin658	bin2096	-0.186886	7.33048	6.68043e-05
FLSL	bin667	bin1950	-0.203	9.5673	3.20508e-06
FLSL	bin685	bin796	-0.230191	9.7608	3.37609e-06
FLSL	bin718	bin2689	-0.19432	7.30548	6.25377e-05
FLSL	bin718	bin1160	-0.184002	7.49353	5.22101e-05
FLSL	bin722	bin1076	-0.201467	8.63632	1.37523e-05
FLSL	bin796	bin2622	-0.184291	8.14213	1.94661e-05
FLSL	bin804	bin2578	-0.434121	8.1551	2.51144e-05
FLSL	bin932	bin1593	-0.173135	7.20565	7.47636e-05
FLSL	bin936	bin1000	-0.204415	7.27245	7.21538e-05
FLSL	bin937	bin1000	-0.204415	7.27245	7.21538e-05
FLSL	bin945	bin1637	-0.186796	8.51796	1.32736e-05
FLSL	bin946	bin1600	-0.204888	9.3914	5.72139e-06
FLSL	bin951	bin1661	-0.179712	8.09113	2.69723e-05
FLSL	bin952	bin1663	-0.17095	7.32461	6.24205e-05
FLSL	bin955	bin1668	-0.181708	8.2195	2.12461e-05
FLSL	bin962	bin1196	-0.171602	7.34694	6.2198e-05
FLSL	bin986	bin2724	-0.239428	13.9503	2.08531e-08
FLSL	bin996	bin1223	-0.172034	7.02431	9.40878e-05
FLSL	bin1001	bin2746	-0.199002	9.38826	4.02251e-06
FLSL	bin1027	bin1193	-0.190681	8.23159	2.12156e-05
FLSL	bin1030	bin1404	-0.192179	8.1683	2.39156e-05
FLSL	bin1045	bin1205	-0.179392	7.50601	4.98827e-05
FLSL	bin1069	bin2624	-0.17379	6.8901	8.39156e-05
FLSL	bin1074	bin1823	-0.183449	8.06463	2.5347e-05
FLSL	bin1103	bin2068	-0.176399	7.38482	5.67423e-05
FLSL	bin1130	bin1825	-0.184625	8.14734	2.45523e-05
FLSL	bin1136	bin2718	-0.187672	8.24978	1.84623e-05
FLSL	bin1141	bin2696	-0.200728	9.73406	2.50545e-06
FLSL	bin1143	bin1911	-0.182803	7.71245	3.19158e-05
FLSL	bin1174	bin2680	-0.18248	7.88385	2.11744e-05
FLSL	bin1182	bin2675	-0.19165	8.80744	9.74982e-06
FLSL	bin1186	bin2171	-0.188764	8.68018	1.15664e-05
FLSL	bin1206	bin2139	-0.185502	7.99602	2.43373e-05
FLSL	bin1207	bin1868	-0.20907	10.6638	1.13367e-06
FLSL	bin1226	bin1796	-0.189078	8.15029	2.18815e-05
FLSL	bin1234	bin2525	-0.168236	7.00397	9.68641e-05
FLSL	bin1335	bin1824	-0.179695	7.69711	4.14101e-05
FLSL	bin1365	bin2717	-0.177463	7.36501	6.00489e-05
FLSL	bin1392	bin1728	-0.178675	7.3763	5.79024e-05
FLSL	bin1458	bin1903	-0.2187	10.7939	7.87664e-07
FLSL	bin1579	bin2684	-0.188658	7.71669	2.16074e-05
FLSL	bin1601	bin2108	-0.183966	8.20767	2.2179e-05
FLSL	bin1613	bin2485	-0.182932	8.02818	2.71785e-05
FLSL	bin1671	bin1898	-0.228166	12.8166	6.88067e-08
FLSL	bin1735	bin1901	-0.231653	12.729	7.74069e-08
FLSL	bin1735	bin1902	-0.231653	12.729	7.74069e-08
FLSL	bin1823	bin2327	-0.17185	7.07479	8.10915e-05
FLSL	bin1881	bin2680	-0.216953	11.5482	2.73524e-07
FLSL	bin1896	bin2686	-0.223346	12.1165	1.33148e-07
FLSL	bin1903	bin2171	-0.178181	7.64429	3.77718e-05
FLSL	bin1926	bin2725	-0.178561	7.39094	4.78892e-05
FLSL	bin1950	bin2601	-0.23089	12.3689	8.83449e-08
FLSL	bin1979	bin2686	-0.174257	7.23177	5.54332e-05
FLSL	bin2082	bin2676	-0.217749	10.864	7.96417e-07
SDW	bin54	bin2630	-1.23297	9.72977	3.47098e-06
SDW	bin82	bin340	-1.09986	7.0581	8.90785e-05
SDW	bin99	bin2258	-1.03927	7.26081	7.26904e-05
SDW	bin168	bin2568	-1.32486	11.6775	3.57619e-07
SDW	bin278	bin1842	1.00273	6.97286	9.63443e-05
SDW	bin340	bin2646	-1.09181	7.18141	7.83976e-05
SDW	bin344	bin1978	-1.1462	7.26556	7.07816e-05
SDW	bin615	bin1833	-1.08936	7.14376	8.36332e-05
SDW	bin1053	bin2729	-1.0683	7.21128	7.63069e-05
SDW	bin1282	bin2745	-1.05773	7.95539	3.174e-05
SDW	bin1333	bin2307	-0.996373	7.03281	9.26943e-05
SDW	bin1621	bin2093	-1.20643	8.99396	8.54794e-06

## Sheet: HD_Ex2
Table S6. Two-locus combinations showing significant epistatic effects under HD. LD, low density; MD, medium density; HD, high density; SH, seedling height; FLSL, first leaf sheath length; FLL, first leaf length; SLL, second leaf length; SDW, shoot dry weight; RDW, root dry weight. Var, the percentage (%) of variation explained by the interaction.
Trait	Locus_1	Locus_2	Epistasis_effect	Var	p_value
FLL	bin53	bin1962	-0.259354	6.6953	7.2096e-05
FLL	bin55	bin1859	-0.269013	7.43992	3.06061e-05
FLL	bin71	bin1890	-0.26786	7.50668	2.76583e-05
FLL	bin72	bin408	-0.283335	7.89626	1.26633e-05
FLL	bin72	bin1900	-0.268972	7.05795	7.49592e-05
FLL	bin93	bin2608	-0.267659	6.92548	5.20402e-05
FLL	bin106	bin2724	-0.270469	6.84409	8.08131e-05
FLL	bin142	bin1772	-0.289185	7.7805	1.58742e-05
FLL	bin145	bin730	-0.329491	7.36933	4.08874e-05
FLL	bin146	bin1227	-0.257887	6.71975	8.94656e-05
FLL	bin271	bin1994	-0.342025	12.0084	1.03828e-07
FLL	bin292	bin2269	-0.264047	7.22074	5.71855e-05
FLL	bin338	bin661	-0.342258	8.93147	7.04092e-06
FLL	bin383	bin632	-0.271384	7.48445	2.26794e-05
FLL	bin477	bin1098	-0.273575	7.85384	2.22828e-05
FLL	bin565	bin1556	0.288462	8.3349	4.42448e-06
FLL	bin590	bin2640	-0.2792	7.95212	1.40448e-05
FLL	bin643	bin2604	-0.256995	6.54479	9.61337e-05
FLL	bin643	bin1783	-0.274329	6.62036	7.47098e-05
FLL	bin653	bin2708	-0.287503	8.10411	1.44429e-05
FLL	bin657	bin1338	-0.281908	8.23646	1.58736e-05
FLL	bin666	bin1786	-0.288075	7.5695	2.53332e-05
FLL	bin685	bin2728	-0.353704	7.70309	3.22176e-05
FLL	bin685	bin1776	-0.399009	11.5346	1.21177e-07
FLL	bin686	bin2432	-0.326368	8.82997	4.73219e-06
FLL	bin701	bin2718	-0.313694	8.31337	1.20389e-05
FLL	bin722	bin1633	-0.28014	6.79011	6.31384e-05
FLL	bin725	bin1922	-0.288452	7.35622	4.78146e-05
FLL	bin729	bin1907	-0.279504	7.0564	5.98312e-05
FLL	bin730	bin2510	-0.344855	9.77781	1.56423e-06
FLL	bin730	bin1381	-0.284685	7.15696	5.52441e-05
FLL	bin730	bin2189	-0.280858	6.81478	4.50986e-05
FLL	bin786	bin1201	-0.276731	7.64505	3.4349e-05
FLL	bin902	bin1042	0.284631	7.66932	3.64005e-05
FLL	bin942	bin1095	-0.26894	7.28441	6.75342e-05
FLL	bin955	bin1419	-0.303344	9.43018	4.88468e-06
FLL	bin1014	bin2011	-0.270646	7.06265	8.98924e-05
FLL	bin1061	bin2007	-0.268836	7.04767	9.2477e-05
FLL	bin1073	bin1812	-0.283555	7.95683	2.81241e-05
FLL	bin1112	bin1227	-0.281147	7.97433	2.34504e-05
FLL	bin1184	bin1446	0.284795	7.54488	4.14812e-05
FLL	bin1193	bin1775	-0.263479	7.01181	4.57023e-05
FLL	bin1201	bin1786	-0.26948	7.22805	3.61245e-05
FLL	bin1201	bin1869	-0.282221	8.29774	1.27057e-05
FLL	bin1205	bin1854	-0.262293	7.14999	4.79941e-05
FLL	bin1383	bin1734	-0.330514	10.7281	8.82737e-07
FLL	bin1416	bin1681	-0.264506	7.17195	7.60912e-05
FLL	bin1416	bin1755	-0.256714	6.65432	9.81872e-05
FLL	bin1703	bin1920	-0.30367	9.3837	4.48102e-06
FLL	bin1715	bin2002	-0.400381	16.4302	9.3808e-10
FLL	bin1749	bin2540	-0.274635	7.6343	3.96235e-05
FLL	bin1786	bin2624	-0.275458	7.43996	2.46009e-05
FLL	bin1994	bin2180	-0.249404	6.53066	6.59854e-05
SH	bin2352	bin2667	0.710026	7.794	3.38458e-05
SH	bin50	bin1931	-0.727843	8.95258	8.58637e-06
SH	bin64	bin1962	-0.756749	9.87745	2.83176e-06
SH	bin119	bin145	-1.31461	8.4671	1.64904e-05
SH	bin130	bin2742	-0.694886	8.38661	1.77573e-05
SH	bin141	bin2565	-0.683921	7.9533	3.21781e-05
SH	bin146	bin2561	-0.69427	7.87994	3.27276e-05
SH	bin190	bin2174	-0.662554	7.1876	7.92028e-05
SH	bin250	bin2271	-0.623832	7.1021	7.49809e-05
SH	bin257	bin614	-0.74964	9.96468	2.5257e-06
SH	bin270	bin2636	-0.641959	7.16565	5.22472e-05
SH	bin322	bin1166	-0.643937	6.91931	3.36322e-05
SH	bin410	bin1600	-0.661681	7.04571	8.58244e-05
SH	bin423	bin2399	-0.632506	7.00598	8.64094e-05
SH	bin487	bin1901	-0.626739	6.97721	9.81997e-05
SH	bin487	bin1961	-0.640139	7.38425	5.62667e-05
SH	bin533	bin1605	-0.669439	7.77778	3.78118e-05
SH	bin615	bin1853	-0.758501	10.4663	1.49248e-06
SH	bin615	bin1931	-0.641383	7.50357	4.94046e-05
SH	bin619	bin1262	-0.635437	7.26508	6.94075e-05
SH	bin641	bin1224	-0.652133	7.02791	7.94773e-05
SH	bin658	bin1033	-0.8072	8.81614	1.14898e-05
SH	bin975	bin2727	-0.809125	12.0089	2.33168e-07
SH	bin1028	bin1403	-0.725468	8.70259	1.30765e-05
SH	bin1051	bin1280	-0.678097	7.5138	5.41025e-05
SH	bin1148	bin2104	-0.642699	6.95806	9.84397e-05
SH	bin1168	bin1901	-0.680207	7.47301	5.33513e-05
SH	bin1173	bin2107	-0.633985	7.10019	8.57275e-05
SH	bin1211	bin1867	-0.653188	7.67719	3.9766e-05
SH	bin1217	bin2175	-0.651169	7.40363	5.38483e-05
SH	bin1298	bin1681	-0.626289	6.94431	9.94506e-05
SH	bin1456	bin1914	-0.729763	8.838	1.00935e-05
SH	bin1458	bin1901	-0.718978	8.55868	1.47962e-05
SH	bin1474	bin2085	-0.794887	10.1023	2.106e-06
SH	bin1492	bin2268	-0.702584	7.36482	5.87581e-05
SH	bin1601	bin2105	-0.805889	11.5285	4.11066e-07
SH	bin1607	bin1853	-0.672054	8.21256	2.25716e-05
SH	bin1639	bin2086	-0.817145	10.7297	8.25989e-07
SH	bin1671	bin1903	-0.796672	11.3184	4.5525e-07
SH	bin1746	bin1949	-0.661234	7.60017	4.04749e-05
SH	bin1769	bin1962	-0.666577	7.96318	2.88505e-05
SH	bin1801	bin1975	-0.724881	8.69788	1.1495e-05
SH	bin1811	bin1916	-0.675093	7.6657	4.18271e-05
SH	bin1886	bin2636	-0.614582	6.8828	9.3745e-05
SH	bin1914	bin2777	-0.707551	8.58142	1.32817e-05
SH	bin1931	bin2350	-0.639291	7.16799	7.0188e-05
SH	bin1931	bin2602	-0.640137	7.23207	6.8277e-05
SH	bin1933	bin2385	-0.616756	6.97054	9.79736e-05
SH	bin1950	bin2600	-0.649634	7.17673	6.88509e-05
SH	bin2046	bin2744	-0.701395	8.45951	1.16257e-05
SH	bin2086	bin2697	-0.71291	8.35537	1.71202e-05
SH	bin2089	bin2514	-0.642618	7.05567	8.95175e-05
SH	bin2111	bin2714	-0.635105	7.16021	7.47972e-05
SH	bin2155	bin2679	-0.61337	6.79687	8.95654e-05
RDW	bin2417	bin2656	-0.418119	7.44556	5.27363e-05
RDW	bin233	bin435	-0.401893	7.17133	8.1224e-05
RDW	bin411	bin2275	-0.40451	7.65769	3.58728e-05
RDW	bin436	bin855	-0.415059	7.80225	3.75383e-05
RDW	bin589	bin2155	-0.495203	10.1854	1.79553e-06
RDW	bin1029	bin2093	-0.473661	7.49483	4.52069e-05
RDW	bin1050	bin2289	-0.426786	8.17889	2.10936e-05
RDW	bin1131	bin1941	-0.442694	7.92495	3.17653e-05
RDW	bin1639	bin2421	-0.456235	8.41917	1.78051e-05
RDW	bin1741	bin2403	-0.404595	7.33142	5.85877e-05
RDW	bin1928	bin2105	-0.407299	7.42107	4.81615e-05
RDW	bin2093	bin2423	-0.408433	7.19945	6.3904e-05
SLL	bin50	bin185	-0.578652	7.73003	2.91158e-05
SLL	bin50	bin1904	-0.631628	10.2918	1.41166e-06
SLL	bin84	bin380	-0.521131	6.94449	7.51775e-05
SLL	bin84	bin1269	-0.499581	6.71808	9.01146e-05
SLL	bin86	bin160	-0.553719	7.91075	2.418e-05
SLL	bin86	bin1580	-0.581044	9.02395	5.50671e-06
SLL	bin86	bin1896	-0.500492	6.81544	9.66701e-05
SLL	bin93	bin798	-0.52611	7.7656	2.5745e-05
SLL	bin2415	bin2654	-0.510465	7.05175	8.26721e-05
SLL	bin157	bin1600	-0.568055	7.94977	2.77265e-05
SLL	bin174	bin1194	-0.555715	8.56236	1.24552e-05
SLL	bin177	bin2753	-0.522505	7.31338	5.12661e-05
SLL	bin177	bin1679	-0.519797	7.5715	3.6487e-05
SLL	bin180	bin1085	-0.499986	6.84598	8.76175e-05
SLL	bin186	bin1195	-0.527887	7.36054	3.97136e-05
SLL	bin198	bin1403	-0.530641	7.27854	5.39449e-05
SLL	bin211	bin1398	-0.525005	7.23959	5.54005e-05
SLL	bin211	bin1469	-0.625547	9.53544	3.37747e-06
SLL	bin220	bin341	-0.592627	7.72947	3.55283e-05
SLL	bin220	bin1052	-0.522603	7.19299	7.10262e-05
SLL	bin254	bin1198	-0.590479	9.56081	4.43512e-06
SLL	bin302	bin1588	-0.597527	8.06336	1.92543e-05
SLL	bin339	bin1699	-0.576181	7.8884	3.4404e-05
SLL	bin378	bin1011	-0.560934	7.62039	4.36902e-05
SLL	bin391	bin1961	-0.537542	7.73039	4.06951e-05
SLL	bin394	bin1008	-0.537223	7.57594	4.81822e-05
SLL	bin409	bin1980	-0.512403	7.44069	5.33871e-05
SLL	bin675	bin1910	-0.565663	7.6509	3.95008e-05
SLL	bin680	bin1073	-0.605719	7.97358	2.8748e-05
SLL	bin737	bin1296	-0.558269	6.90761	7.17765e-05
SLL	bin934	bin1073	-0.522975	7.56181	4.97787e-05
SLL	bin934	bin1585	-0.508157	7.2315	6.46117e-05
SLL	bin955	bin1668	-0.493849	6.91401	9.77867e-05
SLL	bin958	bin1403	-0.598944	9.91053	2.56896e-06
SLL	bin959	bin1196	-0.636171	11.578	3.3381e-07
SLL	bin965	bin1669	-0.496244	6.99265	9.08842e-05
SLL	bin999	bin2735	-0.537478	7.84951	3.39114e-05
SLL	bin1000	bin2735	-0.537478	7.84951	3.39114e-05
SLL	bin1007	bin1463	-0.583071	8.26852	2.19186e-05
SLL	bin1011	bin1197	-0.622991	10.3882	1.57926e-06
SLL	bin1030	bin1404	-0.684458	11.7993	2.34503e-07
SLL	bin1045	bin1206	-0.586407	9.30692	5.60243e-06
SLL	bin1061	bin2554	-0.51553	7.14454	6.46032e-05
SLL	bin1071	bin1823	-0.607601	10.2458	1.92648e-06
SLL	bin1103	bin1226	-0.552643	8.07504	2.66949e-05
SLL	bin1195	bin1963	-0.513637	7.48726	5.58118e-05
SLL	bin1198	bin2406	-0.50717	7.32017	6.01889e-05
SLL	bin1202	bin2131	-0.507851	6.95191	8.10262e-05
SLL	bin1204	bin1869	-0.72426	14.6737	7.38612e-09
SLL	bin1204	bin1946	-0.509335	7.27868	6.93163e-05
SLL	bin1222	bin2176	-0.62448	10.768	9.7816e-07
SLL	bin1335	bin1824	-0.506156	6.95452	9.43835e-05
SLL	bin1339	bin1681	-0.578062	9.29074	6.34553e-06
SLL	bin1375	bin1701	-0.521849	7.55069	5.19956e-05
SLL	bin1376	bin2690	-0.545299	7.75263	3.95881e-05
SLL	bin1382	bin1731	-0.609042	9.69871	3.80574e-06
SLL	bin1429	bin2679	-0.573152	7.7353	3.42999e-05
SLL	bin1456	bin1900	-0.586826	8.78908	1.13629e-05
SLL	bin1476	bin2090	-0.532834	6.98847	9.65496e-05
SLL	bin1580	bin2707	-0.568451	8.62248	1.13852e-05
SLL	bin1585	bin1813	-0.545129	8.02056	2.37839e-05
SLL	bin1679	bin1922	-0.604356	10.1802	2.14551e-06
SLL	bin1781	bin2176	-0.516099	7.16299	7.0015e-05
SLL	bin1782	bin1904	-0.623525	10.0911	2.19614e-06
SLL	bin1786	bin2675	-0.513147	7.06783	8.66346e-05
SLL	bin1824	bin2404	-0.609085	10.0236	2.23025e-06
SLL	bin1900	bin2391	-0.528743	7.4354	5.48333e-05
SLL	bin2074	bin2747	-0.533131	7.6169	4.79547e-05
FLSL	bin49	bin254	-0.212795	9.18439	7.21182e-06
FLSL	bin53	bin1961	-0.316447	20.5131	1.66631e-12
FLSL	bin66	bin2198	-0.21491	9.41238	4.38054e-06
FLSL	bin66	bin1393	-0.215887	9.52668	4.35421e-06
FLSL	bin86	bin1352	-0.190977	7.70075	3.96419e-05
FLSL	bin88	bin256	-0.216952	9.87721	2.95912e-06
FLSL	bin88	bin1256	-0.22568	10.4406	1.6249e-06
FLSL	bin90	bin1124	-0.196003	7.94821	3.13701e-05
FLSL	bin91	bin798	-0.22423	10.7331	1.07476e-06
FLSL	bin115	bin2180	-0.188999	7.61065	4.81871e-05
FLSL	bin173	bin646	-0.193151	7.85721	3.26627e-05
FLSL	bin184	bin1195	-0.222562	9.9189	2.75017e-06
FLSL	bin185	bin1225	-0.213004	8.85154	9.05091e-06
FLSL	bin187	bin253	-0.205039	8.23188	2.22299e-05
FLSL	bin193	bin2688	-0.211325	7.89116	2.67529e-05
FLSL	bin203	bin658	-0.194139	7.24298	7.28074e-05
FLSL	bin203	bin1640	-0.28081	15.41	3.41778e-09
FLSL	bin206	bin1095	-0.182929	7.0499	9.15456e-05
FLSL	bin207	bin1151	-0.189545	7.24252	7.08069e-05
FLSL	bin207	bin2171	-0.187913	7.17433	7.93291e-05
FLSL	bin210	bin613	-0.200481	7.79093	3.7993e-05
FLSL	bin211	bin1489	-0.226593	8.51144	1.57241e-05
FLSL	bin249	bin326	-0.226875	9.51374	2.48261e-06
FLSL	bin253	bin1198	-0.183025	7.01026	9.76596e-05
FLSL	bin254	bin2636	-0.225768	10.0283	2.35944e-06
FLSL	bin254	bin666	-0.206105	7.9019	3.37242e-05
FLSL	bin256	bin1812	-0.187071	7.14598	7.67074e-05
FLSL	bin257	bin1027	-0.198792	7.46002	5.56459e-05
FLSL	bin261	bin1987	-0.185828	7.34483	5.46116e-05
FLSL	bin268	bin1825	-0.185778	6.87986	9.57021e-05
FLSL	bin268	bin1993	-0.183699	7.15794	5.60418e-05
FLSL	bin270	bin2270	-0.178128	6.92566	7.02693e-05
FLSL	bin279	bin1225	-0.184841	7.26042	5.50905e-05
FLSL	bin285	bin1075	-0.182738	6.95308	6.90962e-05
FLSL	bin286	bin2687	-0.200773	8.26172	1.41392e-05
FLSL	bin325	bin2089	-0.192366	6.7498	7.66768e-05
FLSL	bin388	bin1221	-0.197254	7.62038	4.38925e-05
FLSL	bin390	bin1945	-0.19281	7.27972	5.39971e-05
FLSL	bin400	bin1071	-0.208537	9.27577	4.93682e-06
FLSL	bin400	bin1138	-0.210143	9.39345	4.16558e-06
FLSL	bin410	bin697	-0.21158	7.44318	5.66484e-05
FLSL	bin411	bin715	-0.194282	7.04424	9.48299e-05
FLSL	bin423	bin2399	-0.198705	8.19086	2.38199e-05
FLSL	bin425	bin1037	-0.193553	7.01064	8.66763e-05
FLSL	bin536	bin2680	-0.190689	7.81945	3.23771e-05
FLSL	bin595	bin2671	-0.186384	7.04651	8.47597e-05
FLSL	bin639	bin1226	-0.191838	7.43397	5.18012e-05
FLSL	bin652	bin1951	-0.219756	10.4333	9.59207e-07
FLSL	bin657	bin2479	-0.197374	7.39518	5.88154e-05
FLSL	bin659	bin1033	-0.212949	7.44943	5.69514e-05
FLSL	bin660	bin2096	-0.203509	7.61944	4.78693e-05
FLSL	bin662	bin1954	-0.210897	9.24524	5.32184e-06
FLSL	bin678	bin2558	-0.218014	7.82676	3.73361e-05
FLSL	bin680	bin798	-0.217991	8.09319	2.60754e-05
FLSL	bin693	bin807	-0.221772	8.77982	1.14317e-05
FLSL	bin720	bin1167	-0.209991	8.33348	2.01522e-05
FLSL	bin721	bin1084	-0.249143	11.3475	5.35956e-07
FLSL	bin721	bin2134	-0.213145	8.17306	2.40638e-05
FLSL	bin722	bin1075	-0.246328	11.2207	5.76886e-07
FLSL	bin723	bin1950	-0.217651	8.58631	9.78606e-06
FLSL	bin731	bin1125	-0.215849	8.28834	2.02069e-05
FLSL	bin732	bin1290	-0.214878	8.21778	2.05046e-05
FLSL	bin737	bin1224	-0.215989	6.97638	8.47177e-05
FLSL	bin785	bin1138	-0.2006	7.06006	8.70799e-05
FLSL	bin785	bin1911	-0.187753	6.83664	9.40478e-05
FLSL	bin798	bin1812	-0.200235	8.30193	1.85845e-05
FLSL	bin807	bin2621	-0.202601	8.58809	1.24153e-05
FLSL	bin809	bin2672	-0.210879	9.44121	5.02805e-06
FLSL	bin811	bin920	-0.182688	7.26415	7.0066e-05
FLSL	bin916	bin2409	-0.184037	7.31178	5.58392e-05
FLSL	bin929	bin1593	-0.196942	8.10312	2.55763e-05
FLSL	bin946	bin1600	-0.203417	8.04526	2.79563e-05
FLSL	bin955	bin1667	-0.201916	8.80926	1.02215e-05
FLSL	bin962	bin2738	-0.216002	10.0996	2.05471e-06
FLSL	bin975	bin1822	-0.181931	6.97089	8.73905e-05
FLSL	bin986	bin2725	-0.227086	10.9236	8.46772e-07
FLSL	bin1028	bin1404	-0.199981	7.8336	3.61228e-05
FLSL	bin1029	bin1193	-0.216525	9.13816	7.476e-06
FLSL	bin1031	bin1187	-0.202356	7.78191	3.74997e-05
FLSL	bin1045	bin1205	-0.198094	7.9546	3.09016e-05
FLSL	bin1069	bin2623	-0.214407	9.20391	5.23696e-06
FLSL	bin1070	bin1817	-0.202411	8.54356	1.31347e-05
FLSL	bin1071	bin1823	-0.203238	8.74874	9.40446e-06
FLSL	bin1113	bin1216	-0.194715	7.83187	3.52492e-05
FLSL	bin1115	bin1196	-0.199092	8.08623	2.53531e-05
FLSL	bin1120	bin1824	-0.203784	8.55369	1.20681e-05
FLSL	bin1143	bin1911	-0.255627	13.1071	3.58328e-08
FLSL	bin1182	bin2674	-0.240968	12.101	1.85157e-07
FLSL	bin1182	bin2675	-0.240968	12.101	1.85157e-07
FLSL	bin1186	bin2171	-0.228271	11.0322	6.78266e-07
FLSL	bin1190	bin1589	-0.191539	7.71309	3.81147e-05
FLSL	bin1190	bin1979	-0.209653	9.57453	2.98597e-06
FLSL	bin1191	bin2071	-0.183422	6.92238	9.76824e-05
FLSL	bin1197	bin1281	-0.198486	8.38678	1.49864e-05
FLSL	bin1200	bin2136	-0.18671	7.11101	8.29592e-05
FLSL	bin1209	bin1865	-0.234276	11.6424	3.42798e-07
FLSL	bin1226	bin1780	-0.211507	7.63067	3.87648e-05
FLSL	bin1234	bin2524	-0.18257	7.15862	7.89979e-05
FLSL	bin1280	bin2686	-0.19322	7.75419	2.78897e-05
FLSL	bin1312	bin1802	-0.210662	8.80702	1.09935e-05
FLSL	bin1335	bin1824	-0.207462	8.91663	8.58699e-06
FLSL	bin1342	bin2679	-0.183618	7.0408	7.69537e-05
FLSL	bin1458	bin1903	-0.231814	10.5396	1.04977e-06
FLSL	bin1601	bin2484	-0.198532	8.25304	1.75125e-05
FLSL	bin1601	bin2108	-0.207785	9.10003	6.92653e-06
FLSL	bin1643	bin1912	-0.238835	11.9677	1.62063e-07
FLSL	bin1671	bin1900	-0.248333	13.0674	3.99632e-08
FLSL	bin1747	bin2630	-0.186633	7.03941	8.81691e-05
FLSL	bin1809	bin1978	-0.193984	7.67051	2.8151e-05
FLSL	bin1821	bin2335	-0.212874	9.42421	4.00256e-06
FLSL	bin1881	bin2680	-0.226019	10.8928	6.94921e-07
FLSL	bin1896	bin2686	-0.21251	9.53345	3.60161e-06
FLSL	bin1901	bin2172	-0.216851	9.73818	2.91883e-06
FLSL	bin1950	bin2602	-0.237421	11.5797	2.27682e-07
FLSL	bin1979	bin2686	-0.180239	6.72409	9.90272e-05
FLSL	bin2072	bin2175	-0.205554	8.81049	1.09009e-05
FLSL	bin2077	bin2678	-0.250252	12.2966	1.37917e-07
FLSL	bin2162	bin2685	-0.178808	6.87239	8.85531e-05
SDW	bin2301	bin2445	-0.860435	7.2465	7.41793e-05
SDW	bin138	bin901	0.922938	7.87134	3.38143e-05
SDW	bin203	bin2648	-0.919848	7.27943	7.06587e-05
SDW	bin496	bin1724	0.852852	7.01183	9.318e-05
SDW	bin535	bin696	0.932448	6.90836	9.41311e-05
SDW	bin558	bin2648	-0.839134	7.0457	9.32205e-05
SDW	bin1226	bin1769	-1.09667	10.0936	2.08933e-06
SDW	bin1293	bin2740	-0.895637	8.09335	2.4868e-05
SDW	bin1346	bin2746	-0.855308	7.21843	7.71812e-05
SDW	bin1457	bin2233	-0.909036	7.47285	5.22844e-05
SDW	bin1457	bin2144	-0.97496	8.67645	1.23536e-05
SDW	bin1576	bin1603	-0.897376	7.6413	3.93039e-05
SDW	bin1628	bin2079	-1.06926	9.43498	5.20023e-06
SDW	bin1845	bin2509	0.838716	7.01162	9.68714e-05

## Sheet: LD_Ex3
Table S6. Two-locus combinations showing significant epistatic effects under LD. LD, low density; MD, medium density; HD, high density; SH, seedling height; FLSL, first leaf sheath length; FLL, first leaf length; SLL, second leaf length; SDW, shoot dry weight; RDW, root dry weight. Var, the percentage (%) of variation explained by the interaction.
Trait	Locus_1	Locus_2	Epistasis_effect	Var	p_value
FLL	bin20	bin1442	0.26779	8.19169	1.55832e-05
FLL	bin2331	bin2593	0.264041	8.4666	1.00719e-05
FLL	bin80	bin828	-0.269201	7.3596	5.2444e-05
FLL	bin99	bin1182	0.215478	6.65998	6.33314e-05
FLL	bin145	bin1774	-0.220695	6.58228	5.75378e-05
FLL	bin249	bin2271	-0.214781	6.9619	3.16179e-05
FLL	bin255	bin1374	-0.233875	8.16058	1.01991e-05
FLL	bin271	bin1992	-0.257391	9.73237	1.24268e-06
FLL	bin290	bin1975	-0.248216	8.49641	6.77459e-06
FLL	bin309	bin876	-0.24119	7.05592	7.56188e-05
FLL	bin319	bin658	-0.2432	7.36131	3.97854e-05
FLL	bin380	bin2751	-0.220302	7.01743	6.2485e-05
FLL	bin532	bin2368	0.213042	6.79255	6.6031e-05
FLL	bin559	bin2438	0.236251	8.25485	6.06637e-06
FLL	bin559	bin1580	0.210727	6.54437	3.73337e-05
FLL	bin562	bin805	0.233863	7.96345	1.21225e-05
FLL	bin641	bin986	-0.216164	6.91282	8.37888e-05
FLL	bin656	bin2716	-0.223472	6.61347	8.12353e-05
FLL	bin657	bin1338	-0.214335	6.85711	5.96495e-05
FLL	bin666	bin1786	-0.227672	6.80933	6.52291e-05
FLL	bin937	bin1095	-0.224809	7.51007	4.6393e-05
FLL	bin955	bin1419	-0.236755	8.27326	1.71875e-05
FLL	bin986	bin2530	-0.221966	7.15417	5.47768e-05
FLL	bin1009	bin2011	-0.229663	7.31031	6.74273e-05
FLL	bin1189	bin1443	0.251111	8.08314	1.97191e-05
FLL	bin1249	bin2315	0.228842	7.82888	2.5779e-05
FLL	bin1260	bin2341	0.224302	7.46341	4.4539e-05
FLL	bin1419	bin1680	-0.219411	7.08619	7.70748e-05
FLL	bin1440	bin2019	0.276036	9.38411	3.53564e-06
FLL	bin1596	bin2573	0.539837	8.14896	1.00209e-05
FLL	bin1661	bin2000	-0.243734	8.92466	9.69694e-06
FLL	bin1709	bin1920	-0.242648	8.69115	9.5673e-06
FLL	bin1715	bin2003	-0.255382	9.62207	4.23236e-06
FLL	bin1779	bin1858	-0.216714	6.75118	5.09864e-05
FLL	bin1786	bin2620	-0.232414	7.50475	2.18571e-05
FLL	bin1825	bin2189	-0.204994	6.17267	7.67914e-05
FLL	bin1827	bin2405	-0.214451	6.38921	5.11268e-05
FLL	bin1892	bin2114	0.239027	8.4381	6.45443e-06
FLL	bin1915	bin2216	0.249967	9.14663	5.14439e-06
FLL	bin1951	bin2266	0.237464	8.458	1.50753e-05
SH	bin2289	bin2558	-0.654943	7.04444	8.82715e-05
SH	bin24	bin2204	-0.800186	8.3664	1.95713e-05
SH	bin25	bin2387	0.845558	9.41994	5.56802e-06
SH	bin50	bin1006	-0.749788	7.94683	2.9652e-05
SH	bin88	bin1248	-0.70689	7.63119	4.26462e-05
SH	bin107	bin902	0.66164	7.02138	8.72278e-05
SH	bin2557	bin2639	-0.692166	7.51927	4.67594e-05
SH	bin147	bin2461	0.818392	9.99219	1.31438e-06
SH	bin185	bin1225	-0.736997	7.97084	2.36384e-05
SH	bin189	bin2174	-0.687025	7.30444	6.67862e-05
SH	bin211	bin2637	-0.704114	6.9442	9.07121e-05
SH	bin254	bin1225	-0.745926	8.36336	1.55901e-05
SH	bin256	bin614	-0.771991	9.35632	4.83453e-06
SH	bin260	bin1801	-0.719795	7.93962	2.4665e-05
SH	bin262	bin2637	-0.677365	7.02634	7.4816e-05
SH	bin270	bin2270	-0.639628	6.71709	9.12135e-05
SH	bin270	bin2448	-0.662864	7.11707	4.92245e-05
SH	bin272	bin2503	-0.658811	6.66166	5.76917e-05
SH	bin274	bin2479	-0.665124	6.84954	5.29118e-05
SH	bin276	bin1187	-0.757547	9.21244	4.13297e-06
SH	bin280	bin1214	-0.723754	8.47851	9.61673e-06
SH	bin286	bin2654	-0.705256	7.61334	2.3384e-05
SH	bin290	bin2480	-0.658149	6.68762	4.3659e-05
SH	bin344	bin1273	-0.717456	7.09486	7.71531e-05
SH	bin478	bin2622	-0.664484	7.04154	7.79966e-05
SH	bin630	bin2167	0.689593	7.17143	7.26637e-05
SH	bin632	bin1227	-0.659907	6.8045	9.14658e-05
SH	bin659	bin1033	-0.836189	8.63995	1.4127e-05
SH	bin853	bin2296	-0.766654	9.03445	7.86054e-06
SH	bin951	bin2305	-0.77218	9.58861	3.33488e-06
SH	bin962	bin2740	-0.709698	8.21501	2.12528e-05
SH	bin963	bin2318	-0.738888	8.87744	1.04329e-05
SH	bin976	bin2747	-0.759021	9.29029	5.29732e-06
SH	bin992	bin1223	-0.718943	8.01974	2.52389e-05
SH	bin1006	bin2722	-0.783205	9.46894	4.74717e-06
SH	bin1028	bin1403	-0.794295	9.2956	6.45487e-06
SH	bin1035	bin1206	-0.712981	7.64278	4.57422e-05
SH	bin1149	bin1913	-0.709442	7.57359	4.12827e-05
SH	bin1213	bin1867	-0.74932	9.01903	7.4718e-06
SH	bin1220	bin1814	-0.691179	7.64154	4.1308e-05
SH	bin1268	bin1462	-0.698911	7.31957	6.52165e-05
SH	bin1269	bin2689	-0.765641	9.24179	5.63969e-06
SH	bin1280	bin1678	-0.769065	9.43692	5.21373e-06
SH	bin1456	bin1907	-0.803334	9.42204	5.07841e-06
SH	bin1601	bin2105	-0.695268	7.6459	4.60358e-05
SH	bin1620	bin2090	-0.725175	7.32973	6.06157e-05
SH	bin1705	bin1913	-0.710072	7.85834	3.35629e-05
SH	bin1779	bin2630	-0.704442	7.65495	4.08167e-05
SH	bin1837	bin2306	-0.748011	8.93367	7.55412e-06
SH	bin1886	bin2637	-0.686312	7.64804	4.03575e-05
SH	bin1889	bin2645	-0.682879	7.6242	4.2172e-05
SH	bin1910	bin2730	-0.711373	6.98276	9.04452e-05
SH	bin2048	bin2778	-0.736619	8.18532	2.40527e-05
SH	bin2112	bin2369	-0.672836	7.38496	5.9339e-05
RDW	bin151	bin493	-0.686423	8.51135	1.48127e-05
RDW	bin155	bin2047	-0.646812	7.48314	5.30677e-05
RDW	bin329	bin2180	-0.683713	8.4166	1.76202e-05
RDW	bin450	bin1679	0.601784	7.09869	8.90896e-05
RDW	bin573	bin2151	-0.672447	8.03735	2.68334e-05
RDW	bin586	bin1027	-0.635126	7.18975	7.61698e-05
RDW	bin588	bin2155	-0.787064	11.1932	5.22655e-07
RDW	bin601	bin2423	-0.621844	7.25967	7.21412e-05
RDW	bin613	bin1486	-0.786442	7.86473	3.11932e-05
RDW	bin643	bin1823	-0.728891	10.0883	1.88238e-06
RDW	bin709	bin1792	0.627195	7.21203	7.22529e-05
RDW	bin714	bin2203	0.605412	7.12908	7.9408e-05
RDW	bin759	bin2710	0.692646	6.92129	8.41596e-05
RDW	bin762	bin2696	0.69392	7.17891	7.13408e-05
RDW	bin1456	bin2255	-0.688127	8.63869	1.16211e-05
RDW	bin1849	bin2408	-0.650026	8.11273	2.3896e-05
SLL	bin53	bin1861	-0.501637	7.11224	7.66195e-05
SLL	bin64	bin1903	-0.527357	7.7622	3.1557e-05
SLL	bin68	bin2405	-0.480032	6.60231	8.97918e-05
SLL	bin2406	bin2718	-0.502006	7.36413	3.4752e-05
SLL	bin105	bin2745	-0.501317	6.90927	6.62714e-05
SLL	bin185	bin1225	-0.58468	8.98377	5.27099e-06
SLL	bin193	bin2745	-0.480093	6.56927	6.9383e-05
SLL	bin197	bin2687	-0.588784	7.9013	1.23179e-05
SLL	bin198	bin1209	-0.502448	6.6243	7.23449e-05
SLL	bin207	bin2174	-0.547981	8.18627	8.35454e-06
SLL	bin211	bin2747	-0.491174	6.86221	5.34935e-05
SLL	bin216	bin1052	-0.520327	7.21446	4.24955e-05
SLL	bin220	bin1862	-0.49521	6.72682	8.64299e-05
SLL	bin255	bin1320	-0.511506	7.37181	4.44085e-05
SLL	bin255	bin1374	-0.525063	7.88358	2.42625e-05
SLL	bin256	bin1030	-0.535818	7.06775	6.41534e-05
SLL	bin261	bin1938	-0.51732	7.76481	3.18588e-05
SLL	bin271	bin1983	-0.55277	8.54399	1.37389e-05
SLL	bin274	bin1922	-0.512882	6.95153	9.09863e-05
SLL	bin281	bin1945	-0.527004	7.58862	4.21299e-05
SLL	bin288	bin1971	-0.566822	8.18218	2.22191e-05
SLL	bin326	bin653	-0.557628	6.91025	8.21971e-05
SLL	bin428	bin1301	-0.515631	7.6569	2.84314e-05
SLL	bin431	bin2680	-0.519828	7.05541	7.86093e-05
SLL	bin706	bin1921	-0.509156	7.2028	6.18404e-05
SLL	bin737	bin1296	-0.563185	7.22683	3.66487e-05
SLL	bin775	bin1192	-0.523279	7.22705	5.76269e-05
SLL	bin796	bin1207	-0.514838	7.58833	3.5642e-05
SLL	bin902	bin1042	0.536202	7.5132	3.39864e-05
SLL	bin910	bin1558	0.545444	7.95661	8.43782e-06
SLL	bin955	bin1408	-0.646592	12.0926	1.62316e-07
SLL	bin959	bin1196	-0.554163	9.03158	6.90416e-06
SLL	bin959	bin1403	-0.672465	12.8431	6.38858e-08
SLL	bin978	bin2745	-0.530411	8.2126	2.07903e-05
SLL	bin990	bin2724	-0.615047	10.6815	9.88572e-07
SLL	bin1005	bin1225	-0.508494	7.15289	8.10506e-05
SLL	bin1012	bin1412	-0.564415	8.43247	1.6256e-05
SLL	bin1029	bin2719	-0.631875	10.2674	1.39641e-06
SLL	bin1044	bin1208	-0.528477	7.91227	2.12914e-05
SLL	bin1051	bin1838	-0.53157	7.48679	3.53733e-05
SLL	bin1120	bin1217	-0.61244	9.87334	1.69625e-06
SLL	bin1120	bin1219	-0.61244	9.87334	1.69625e-06
SLL	bin1214	bin1861	-0.648702	12.1362	1.7129e-07
SLL	bin1324	bin1823	-0.490061	6.92061	8.52714e-05
SLL	bin1456	bin1904	-0.555514	8.09693	1.78771e-05
SLL	bin1457	bin1892	-0.533379	7.53672	3.24791e-05
SLL	bin1575	bin2697	-0.527734	7.72923	1.11544e-05
SLL	bin1576	bin2697	-0.527734	7.72923	1.11544e-05
SLL	bin1579	bin1861	-0.547609	8.46256	5.75744e-06
SLL	bin1582	bin1823	-0.532518	7.92942	1.67382e-05
SLL	bin1620	bin2074	-0.536199	6.91874	8.27389e-05
SLL	bin1709	bin1912	-0.717985	14.4065	9.21428e-09
SLL	bin1715	bin2003	-0.512281	7.42079	5.95577e-05
SLL	bin1749	bin2541	-0.539473	7.94781	3.06104e-05
SLL	bin1778	bin2745	-0.497217	6.83339	8.32057e-05
SLL	bin1824	bin2399	-0.523211	7.67294	3.38669e-05
SLL	bin1824	bin2189	-0.510732	7.39964	4.29319e-05
SLL	bin1869	bin2191	-0.495256	7.11284	5.70131e-05
SLL	bin1890	bin2646	-0.483539	6.82788	9.37867e-05
SLL	bin1896	bin2687	-0.527942	7.96088	2.51328e-05
SLL	bin1920	bin2208	0.530195	7.92404	3.02464e-05
SLL	bin1926	bin2725	-0.514916	7.19525	7.15468e-05
SLL	bin1950	bin2627	-0.50025	6.91455	9.79831e-05
SLL	bin2018	bin2718	0.524424	7.40634	6.03082e-05
SLL	bin2092	bin2676	-0.586547	9.06857	7.15259e-06
SLL	bin2133	bin2745	-0.565136	9.20759	4.14428e-06
FLSL	bin17	bin2204	-0.158207	7.36329	6.45086e-05
FLSL	bin37	bin255	-0.169624	8.85248	1.08643e-05
FLSL	bin54	bin1961	-0.197846	12.4007	1.33165e-07
FLSL	bin63	bin254	-0.165146	8.83355	1.10477e-05
FLSL	bin64	bin1900	-0.162672	8.47296	1.653e-05
FLSL	bin69	bin1393	-0.173076	9.32704	5.80839e-06
FLSL	bin144	bin1201	-0.172998	9.24945	5.89816e-06
FLSL	bin185	bin1225	-0.195987	11.5684	2.69196e-07
FLSL	bin189	bin2171	-0.149106	7.08926	8.41051e-05
FLSL	bin203	bin1640	-0.156969	7.43329	5.38758e-05
FLSL	bin210	bin2687	-0.180212	9.17335	4.56113e-06
FLSL	bin253	bin1041	-0.152086	7.11201	8.35385e-05
FLSL	bin253	bin1169	-0.152721	7.53501	5.25187e-05
FLSL	bin254	bin2613	-0.166626	8.32026	1.96686e-05
FLSL	bin254	bin328	-0.202415	11.1041	2.30478e-07
FLSL	bin254	bin1377	-0.200303	13.094	5.49864e-08
FLSL	bin255	bin1290	-0.149881	7.38373	6.17491e-05
FLSL	bin257	bin1027	-0.174658	8.88983	9.86291e-06
FLSL	bin259	bin2440	-0.161943	8.48035	1.4032e-05
FLSL	bin262	bin335	-0.184785	9.28806	2.46447e-06
FLSL	bin263	bin1554	-0.1595	8.26467	1.63691e-05
FLSL	bin265	bin1274	-0.147306	7.32122	6.36255e-05
FLSL	bin267	bin2125	-0.163185	8.5201	1.33266e-05
FLSL	bin270	bin1967	-0.151477	7.27764	6.38826e-05
FLSL	bin278	bin1187	-0.15862	8.33562	1.85515e-05
FLSL	bin285	bin1945	-0.153046	7.2767	6.00339e-05
FLSL	bin286	bin2688	-0.158026	7.87448	2.79392e-05
FLSL	bin324	bin657	-0.1641	6.69541	6.89288e-05
FLSL	bin392	bin2619	-0.167982	8.14786	2.31859e-05
FLSL	bin405	bin2672	-0.155503	7.58284	4.55447e-05
FLSL	bin408	bin1290	-0.152531	7.6104	4.64026e-05
FLSL	bin409	bin2618	-0.176802	9.34538	5.7786e-06
FLSL	bin478	bin2620	-0.145814	7.02723	8.81678e-05
FLSL	bin497	bin2764	0.152367	7.57106	3.94832e-05
FLSL	bin667	bin1951	-0.152187	7.24475	6.78849e-05
FLSL	bin914	bin1842	-0.159774	8.11945	2.23224e-05
FLSL	bin935	bin1380	-0.148969	7.41006	4.98388e-05
FLSL	bin943	bin1639	-0.170966	9.55226	3.99518e-06
FLSL	bin958	bin1403	-0.164005	8.75469	1.2167e-05
FLSL	bin962	bin1196	-0.150576	7.58955	4.7412e-05
FLSL	bin968	bin1821	-0.148448	7.19092	7.96038e-05
FLSL	bin976	bin2724	-0.186904	11.7327	3.17221e-07
FLSL	bin979	bin1406	-0.159086	8.11928	2.48503e-05
FLSL	bin990	bin1669	-0.152626	7.49325	5.08019e-05
FLSL	bin991	bin1684	-0.148067	7.05977	8.85986e-05
FLSL	bin996	bin1225	-0.151411	7.31834	5.92275e-05
FLSL	bin1004	bin1656	-0.160355	7.78382	3.87155e-05
FLSL	bin1029	bin1203	-0.160334	7.63296	4.17048e-05
FLSL	bin1030	bin1404	-0.176646	9.25917	6.44675e-06
FLSL	bin1032	bin1640	-0.179024	7.37061	6.39465e-05
FLSL	bin1045	bin1205	-0.157969	7.80895	3.08764e-05
FLSL	bin1052	bin1838	-0.157016	7.29234	6.65429e-05
FLSL	bin1116	bin1198	-0.149915	6.94992	9.19132e-05
FLSL	bin1120	bin1213	-0.174	9.2025	4.53908e-06
FLSL	bin1122	bin1820	-0.16256	8.71166	1.20586e-05
FLSL	bin1126	bin1813	-0.161519	8.40376	1.8185e-05
FLSL	bin1126	bin1911	-0.158488	7.64096	4.0945e-05
FLSL	bin1136	bin2718	-0.152574	7.31555	5.12152e-05
FLSL	bin1182	bin2675	-0.168179	9.09951	6.92699e-06
FLSL	bin1186	bin2171	-0.159227	8.28647	2.10434e-05
FLSL	bin1189	bin1589	-0.153505	7.71216	3.49132e-05
FLSL	bin1207	bin1865	-0.195755	12.6039	1.02285e-07
FLSL	bin1220	bin1860	-0.193001	12.2887	1.50469e-07
FLSL	bin1269	bin2691	-0.151766	7.42657	5.43241e-05
FLSL	bin1365	bin2691	-0.157949	7.71563	3.77426e-05
FLSL	bin1377	bin2690	-0.154593	7.19962	7.05369e-05
FLSL	bin1456	bin1905	-0.179679	9.67373	3.32201e-06
FLSL	bin1457	bin1932	-0.16798	8.72336	9.60399e-06
FLSL	bin1535	bin2633	-0.15809	7.60231	3.29121e-05
FLSL	bin1556	bin2673	-0.151155	6.9599	6.32811e-05
FLSL	bin1567	bin2680	-0.160592	7.95995	1.57883e-05
FLSL	bin1575	bin2691	-0.151376	6.82629	9.14618e-05
FLSL	bin1578	bin2685	-0.163765	7.79454	2.53028e-05
FLSL	bin1600	bin2096	-0.168793	7.26827	7.09301e-05
FLSL	bin1620	bin2073	-0.187768	9.72335	3.64992e-06
FLSL	bin1671	bin2002	-0.15999	8.38415	1.75919e-05
FLSL	bin1700	bin2003	-0.163857	8.72805	1.20809e-05
FLSL	bin1723	bin1911	-0.181404	10.2954	1.67111e-06
FLSL	bin1733	bin1900	-0.197429	12.229	1.67137e-07
FLSL	bin1747	bin2619	-0.168819	8.63502	1.3153e-05
FLSL	bin1749	bin2550	-0.151789	7.46818	5.56164e-05
FLSL	bin1779	bin2685	-0.157849	7.47533	4.521e-05
FLSL	bin1881	bin2680	-0.169081	9.41057	4.58359e-06
FLSL	bin1889	bin2646	-0.177767	10.6037	1.11014e-06
FLSL	bin1892	bin2691	-0.15135	7.55706	4.69691e-05
FLSL	bin1898	bin2618	-0.157469	8.02064	2.8439e-05
FLSL	bin1926	bin2725	-0.168059	8.78402	1.09374e-05
FLSL	bin2073	bin2676	-0.19938	11.7592	2.71374e-07
FLSL	bin2090	bin2748	-0.153987	7.10437	7.59184e-05
SDW	bin21	bin2694	1.19497	7.51202	5.41905e-05
SDW	bin2421	bin2706	-1.16888	8.20647	1.99936e-05
SDW	bin101	bin902	1.26604	9.41464	5.11783e-06
SDW	bin168	bin2556	-1.10002	7.03022	8.64977e-05
SDW	bin246	bin440	-1.12952	7.31493	5.85509e-05
SDW	bin297	bin449	-1.13196	7.35262	6.12651e-05
SDW	bin331	bin630	-1.23936	7.67359	3.60033e-05
SDW	bin390	bin468	-1.18659	7.52887	4.86586e-05
SDW	bin395	bin1507	-1.22315	7.09404	8.18342e-05
SDW	bin432	bin1217	-1.14968	7.52577	3.63374e-05
SDW	bin438	bin2399	-1.28937	9.55919	3.16248e-06
SDW	bin465	bin1771	-1.14052	7.13302	8.32684e-05
SDW	bin488	bin1710	1.3695	10.1578	2.22653e-06
SDW	bin496	bin1724	1.22617	8.71485	1.26004e-05
SDW	bin497	bin1478	1.24084	8.27706	2.01423e-05
SDW	bin510	bin668	1.18312	7.57689	5.01908e-05
SDW	bin513	bin1934	-1.08781	7.1111	8.22817e-05
SDW	bin536	bin696	1.19707	6.99991	9.35157e-05
SDW	bin730	bin1329	-1.18067	6.95038	7.26233e-05
SDW	bin850	bin2309	-1.29831	9.32602	5.18998e-06
SDW	bin1028	bin1400	-1.26213	8.67373	1.28626e-05
SDW	bin1032	bin2462	-1.36785	8.92489	9.27106e-06
SDW	bin1150	bin1914	-1.16678	7.48775	4.80453e-05
SDW	bin1269	bin2428	-1.11698	7.04067	8.72379e-05
SDW	bin1271	bin2746	-1.18553	8.46124	1.62499e-05
SDW	bin1283	bin2688	-1.19456	7.86479	3.54481e-05
SDW	bin1319	bin1704	-1.30566	9.44138	4.35667e-06
SDW	bin1320	bin2070	-1.26018	9.21918	4.70076e-06
SDW	bin1328	bin2691	-1.16887	7.42605	3.82448e-05
SDW	bin1337	bin2428	-1.16583	7.91234	2.38261e-05
SDW	bin1346	bin2745	-1.25024	9.28164	6.39113e-06
SDW	bin1461	bin2250	-1.25319	8.51279	1.37202e-05
SDW	bin1679	bin2506	-1.09676	7.24263	5.55995e-05
SDW	bin1691	bin1789	-1.16395	7.3157	6.32593e-05
SDW	bin1914	bin2397	-1.14904	7.36797	6.27754e-05
SDW	bin1936	bin2525	1.10598	7.23167	3.78394e-05
SDW	bin2089	bin2451	-1.27078	8.44693	1.59654e-05

## Sheet: MD_Ex3
Table S6. Two-locus combinations showing significant epistatic effects under MD. LD, low density; MD, medium density; HD, high density; SH, seedling height; FLSL, first leaf sheath length; FLL, first leaf length; SLL, second leaf length; SDW, shoot dry weight; RDW, root dry weight. Var, the percentage (%) of variation explained by the interaction.
Trait	Locus_1	Locus_2	Epistasis_effect	Var	p_value
FLL	bin19	bin1442	0.269765	7.75214	2.60563e-05
FLL	bin2331	bin2593	0.271424	8.34311	1.12417e-05
FLL	bin27	bin2167	0.264581	7.64417	1.33259e-05
FLL	bin72	bin404	-0.231005	7.00682	3.24102e-05
FLL	bin86	bin2403	-0.20718	5.94031	8.83602e-05
FLL	bin89	bin2727	-0.22191	6.3481	8.91985e-05
FLL	bin99	bin1182	0.22637	6.85444	4.61367e-05
FLL	bin176	bin633	-0.225964	6.87881	5.14187e-05
FLL	bin254	bin1375	-0.226001	7.11165	2.33125e-05
FLL	bin256	bin1003	-0.224753	6.55755	9.96539e-05
FLL	bin271	bin1994	-0.23466	7.59173	2.16106e-05
FLL	bin291	bin1975	-0.237425	7.18715	4.38229e-05
FLL	bin373	bin1408	-0.239058	7.96135	1.33371e-05
FLL	bin431	bin1299	-0.230527	7.02455	6.80384e-05
FLL	bin473	bin1450	-0.228466	7.06421	4.48326e-05
FLL	bin532	bin2368	0.231137	7.45602	2.45182e-05
FLL	bin562	bin2433	0.2433	8.19032	5.89858e-06
FLL	bin562	bin805	0.227064	7.0007	3.25936e-05
FLL	bin564	bin1179	0.220523	6.71965	5.82789e-05
FLL	bin565	bin1556	0.274936	10.169	1.17247e-07
FLL	bin616	bin2210	0.235676	7.59188	2.85674e-05
FLL	bin653	bin2715	-0.229333	6.64177	6.70087e-05
FLL	bin662	bin1010	-0.238089	6.91131	7.47523e-05
FLL	bin666	bin1785	-0.258627	8.194	7.66705e-06
FLL	bin685	bin2717	-0.260678	6.7804	5.68339e-05
FLL	bin685	bin1765	-0.262645	6.54045	6.67569e-05
FLL	bin730	bin2188	-0.231751	6.23186	4.56524e-05
FLL	bin737	bin1381	-0.251954	6.52108	3.83188e-05
FLL	bin901	bin1046	0.244723	7.8519	1.74418e-05
FLL	bin955	bin1419	-0.253026	8.81196	7.91114e-06
FLL	bin1009	bin2011	-0.240238	7.45935	5.5285e-05
FLL	bin1029	bin2719	-0.227563	6.47915	9.3066e-05
FLL	bin1073	bin1812	-0.245558	8.0143	2.37328e-05
FLL	bin1189	bin2329	0.225938	7.08613	8.26843e-05
FLL	bin1371	bin1466	-0.232733	7.00296	5.18519e-05
FLL	bin1415	bin1681	-0.23579	7.69228	3.53458e-05
FLL	bin1418	bin2403	-0.218944	6.62922	6.12431e-05
FLL	bin1418	bin1640	-0.241761	7.36804	3.74435e-05
FLL	bin1418	bin2141	-0.211515	6.07761	7.72108e-05
FLL	bin1440	bin2019	0.258694	7.68598	2.85987e-05
FLL	bin1442	bin2202	0.245319	6.91413	5.84545e-05
FLL	bin1553	bin2322	0.218477	6.47464	6.68538e-05
FLL	bin1598	bin2573	0.512317	6.84541	4.20166e-05
FLL	bin1663	bin2001	-0.243579	8.32238	2.01295e-05
FLL	bin1709	bin1912	-0.226501	6.97569	6.35451e-05
FLL	bin1714	bin2003	-0.264415	9.59189	4.44582e-06
FLL	bin1825	bin2189	-0.220373	6.65226	3.431e-05
FLL	bin1892	bin2114	0.21888	6.59824	5.68378e-05
FLL	bin1915	bin2214	0.282447	10.8902	4.0779e-07
SH	bin2289	bin2558	-0.748566	8.71215	1.00529e-05
SH	bin25	bin2387	0.805994	8.10309	2.59857e-05
SH	bin30	bin2204	-0.881605	8.62428	1.43e-05
SH	bin40	bin1912	-0.779225	8.50519	1.52258e-05
SH	bin50	bin1006	-0.797656	8.5148	1.58146e-05
SH	bin66	bin1817	-0.777643	8.80688	1.09162e-05
SH	bin70	bin1393	-0.731982	7.76782	3.92051e-05
SH	bin88	bin1263	-0.72376	7.74176	3.66324e-05
SH	bin147	bin2461	0.729196	7.51021	3.0083e-05
SH	bin174	bin1205	-0.738291	7.90644	2.75475e-05
SH	bin174	bin2175	-0.700787	7.34772	5.36723e-05
SH	bin184	bin1206	-0.743309	7.76776	3.52832e-05
SH	bin185	bin1224	-0.760746	8.04041	2.17409e-05
SH	bin189	bin2174	-0.714705	7.48379	5.35891e-05
SH	bin210	bin2687	-0.724334	6.83627	8.59432e-05
SH	bin234	bin1964	-0.741492	8.26341	2.15989e-05
SH	bin254	bin1224	-0.775048	8.54815	1.35331e-05
SH	bin257	bin614	-0.811383	9.84776	2.88409e-06
SH	bin264	bin1215	-0.672067	6.96015	8.30291e-05
SH	bin265	bin1215	-0.672067	6.96015	8.30291e-05
SH	bin266	bin2276	-0.67491	7.09818	6.37484e-05
SH	bin276	bin1187	-0.730813	8.11698	1.87722e-05
SH	bin455	bin2671	-0.703147	7.23073	7.28318e-05
SH	bin611	bin1867	-0.748929	8.48146	1.57099e-05
SH	bin659	bin1033	-0.913983	9.77247	3.40797e-06
SH	bin665	bin798	-0.716047	7.36912	5.99823e-05
SH	bin668	bin996	-0.768633	7.7772	3.92089e-05
SH	bin731	bin1035	-0.916444	7.19617	7.41897e-05
SH	bin853	bin2296	-0.777288	8.7921	1.01725e-05
SH	bin951	bin2305	-0.670702	6.84863	9.31e-05
SH	bin976	bin2727	-0.827195	10.5973	1.27815e-06
SH	bin987	bin2318	-0.775833	9.02099	8.88667e-06
SH	bin988	bin2739	-0.812561	9.91007	2.64829e-06
SH	bin995	bin1223	-0.750338	8.2701	1.96678e-05
SH	bin1001	bin2675	-0.733953	7.88924	3.01896e-05
SH	bin1005	bin2755	-0.786336	8.49356	1.47935e-05
SH	bin1006	bin2722	-0.873594	11.1531	6.25813e-07
SH	bin1028	bin1403	-0.917593	11.7446	3.26596e-07
SH	bin1035	bin1203	-0.738602	7.55269	5.11572e-05
SH	bin1052	bin1838	-0.752518	7.7267	4.14677e-05
SH	bin1127	bin1820	-0.693966	7.33563	5.8918e-05
SH	bin1148	bin2103	-0.792051	8.83108	9.89315e-06
SH	bin1212	bin1867	-0.801717	9.74185	3.51587e-06
SH	bin1220	bin1815	-0.705619	7.5084	4.81826e-05
SH	bin1269	bin2689	-0.755663	8.52291	1.32451e-05
SH	bin1273	bin2680	-0.737947	8.001	2.39029e-05
SH	bin1280	bin1701	-0.807846	9.79128	3.34104e-06
SH	bin1457	bin1914	-0.794281	8.84408	1.00963e-05
SH	bin1599	bin2297	-0.714411	7.53903	4.2785e-05
SH	bin1601	bin2105	-0.810119	9.8276	3.20678e-06
SH	bin1620	bin2090	-0.838828	9.28483	6.04976e-06
SH	bin1643	bin1820	-0.693127	7.06486	8.98768e-05
SH	bin1683	bin1870	-0.750667	8.64334	1.3379e-05
SH	bin1735	bin1903	-0.796462	9.31262	6.04728e-06
SH	bin1837	bin2306	-0.78207	9.2455	4.98553e-06
SH	bin1886	bin2637	-0.820649	10.3526	1.56893e-06
SH	bin1895	bin2621	-0.700888	7.31926	5.64246e-05
SH	bin1901	bin2391	-0.715791	7.41217	6.0092e-05
SH	bin1905	bin2777	-0.717416	7.3299	6.54829e-05
SH	bin1910	bin2730	-0.772967	7.80513	3.52494e-05
SH	bin1923	bin2727	-0.719054	7.36496	6.08474e-05
SH	bin1934	bin2600	-0.734989	7.85729	3.48368e-05
SH	bin2048	bin2778	-0.730847	7.6283	4.72061e-05
SH	bin2072	bin2690	-0.744502	6.99872	8.89627e-05
SH	bin2089	bin2747	-0.810917	9.36451	5.0938e-06
SH	bin2155	bin2680	-0.669269	6.84807	9.46849e-05
RDW	bin271	bin629	-0.388293	7.85674	2.79683e-05
RDW	bin318	bin2167	-0.398916	7.74737	4.00577e-05
RDW	bin321	bin2180	-0.393247	7.47591	5.47422e-05
RDW	bin323	bin2174	-0.400435	7.69145	4.35441e-05
RDW	bin491	bin1679	0.378099	7.02802	9.50423e-05
RDW	bin580	bin2161	-0.418727	8.35697	1.81618e-05
RDW	bin605	bin2180	-0.413639	8.36326	1.8495e-05
RDW	bin613	bin1486	-0.489296	7.948	2.82426e-05
RDW	bin909	bin927	0.388541	7.57419	4.77266e-05
RDW	bin1142	bin1836	-0.396905	7.6662	4.41194e-05
RDW	bin2087	bin2764	-0.404577	7.57706	4.81549e-05
SLL	bin17	bin2252	-0.619673	8.06864	2.65028e-05
SLL	bin21	bin2764	0.654623	8.69613	1.20411e-05
SLL	bin49	bin255	-0.643865	9.06954	4.19432e-06
SLL	bin52	bin1898	-0.668133	9.81698	2.58592e-06
SLL	bin53	bin1861	-0.650733	9.58666	3.5547e-06
SLL	bin53	bin1959	-0.705152	11.0329	6.30805e-07
SLL	bin65	bin1818	-0.591976	7.80169	2.96795e-05
SLL	bin71	bin1889	-0.562787	7.30059	4.38004e-05
SLL	bin85	bin1269	-0.563394	7.07971	6.02575e-05
SLL	bin2407	bin2718	-0.646188	9.79135	1.67124e-06
SLL	bin102	bin2745	-0.571149	7.13654	5.18201e-05
SLL	bin132	bin643	-0.585296	7.47007	4.38316e-05
SLL	bin185	bin1225	-0.570918	6.86127	6.23575e-05
SLL	bin193	bin2745	-0.624054	8.89087	2.80486e-06
SLL	bin195	bin2687	-0.753123	10.3551	4.01519e-07
SLL	bin208	bin2174	-0.600338	7.93131	1.05066e-05
SLL	bin216	bin1295	-0.542646	6.86533	5.85835e-05
SLL	bin230	bin1330	-0.552677	7.11368	4.86513e-05
SLL	bin242	bin2746	-0.619938	8.76861	6.40154e-06
SLL	bin249	bin1058	-0.565379	6.90662	6.33883e-05
SLL	bin254	bin2608	-0.589087	7.45119	3.28463e-05
SLL	bin254	bin1173	-0.543963	6.68081	8.49276e-05
SLL	bin254	bin1222	-0.582787	7.46769	3.31598e-05
SLL	bin254	bin1376	-0.61009	8.51672	8.30252e-06
SLL	bin255	bin1320	-0.61973	8.66784	7.37297e-06
SLL	bin255	bin1374	-0.611709	8.57087	8.2285e-06
SLL	bin256	bin1030	-0.609086	7.31538	4.52567e-05
SLL	bin257	bin875	-0.550652	6.84616	9.87603e-05
SLL	bin261	bin1938	-0.585468	7.96621	2.32311e-05
SLL	bin271	bin1392	-0.558385	7.02665	8.28223e-05
SLL	bin274	bin1983	-0.652021	9.34597	4.24905e-06
SLL	bin287	bin1956	-0.63955	9.22889	5.74751e-06
SLL	bin289	bin2441	-0.585772	7.66257	3.55117e-05
SLL	bin290	bin1971	-0.676859	9.28553	5.60806e-06
SLL	bin325	bin653	-0.670583	8.00927	1.89881e-05
SLL	bin360	bin1398	-0.55014	6.86036	8.63336e-05
SLL	bin410	bin2646	-0.533794	6.5184	9.22828e-05
SLL	bin411	bin1148	-0.536504	6.61965	7.11684e-05
SLL	bin417	bin2751	-0.593988	7.32522	3.35414e-05
SLL	bin428	bin1078	-0.556471	6.82883	8.87826e-05
SLL	bin428	bin1299	-0.577784	7.60564	3.22171e-05
SLL	bin431	bin2680	-0.585473	7.16886	6.87712e-05
SLL	bin489	bin1479	0.58889	7.06816	6.3142e-05
SLL	bin559	bin2439	0.559284	7.10242	7.41128e-05
SLL	bin559	bin2440	0.559284	7.10242	7.41128e-05
SLL	bin565	bin1556	0.561307	6.97802	3.59028e-05
SLL	bin658	bin1339	-0.574719	7.416	4.77309e-05
SLL	bin659	bin1036	-0.612984	7.31316	5.62045e-05
SLL	bin667	bin2418	-0.611538	7.94396	2.32032e-05
SLL	bin667	bin958	-0.64551	8.86926	8.51485e-06
SLL	bin667	bin1911	-0.612991	7.96281	2.83879e-05
SLL	bin667	bin1967	-0.582752	7.33488	6.18094e-05
SLL	bin672	bin2754	-0.624416	7.68112	3.21727e-05
SLL	bin698	bin2747	-0.615073	6.85503	6.17221e-05
SLL	bin699	bin2751	-0.641585	7.34791	3.32937e-05
SLL	bin704	bin2745	-0.571841	6.72234	8.52604e-05
SLL	bin720	bin1633	-0.61907	7.33185	3.38435e-05
SLL	bin729	bin1905	-0.579816	6.71421	7.98519e-05
SLL	bin737	bin1296	-0.641227	7.50417	2.1291e-05
SLL	bin775	bin1192	-0.565801	6.76792	8.54842e-05
SLL	bin777	bin2624	-0.592395	7.34784	5.10995e-05
SLL	bin777	bin2754	-0.626103	7.74144	2.75316e-05
SLL	bin778	bin1080	-0.56821	6.84564	9.06235e-05
SLL	bin793	bin1633	-0.565794	6.96897	6.35127e-05
SLL	bin798	bin1207	-0.577568	7.78374	1.9199e-05
SLL	bin892	bin1115	0.600665	7.48647	4.09869e-05
SLL	bin910	bin1560	0.594208	7.61282	1.09464e-05
SLL	bin955	bin1408	-0.719155	11.9822	1.76552e-07
SLL	bin955	bin1669	-0.577299	7.79276	3.33317e-05
SLL	bin958	bin1196	-0.641109	9.69784	2.42839e-06
SLL	bin959	bin1403	-0.764687	13.3024	3.30466e-08
SLL	bin988	bin2724	-0.73054	12.0708	1.64963e-07
SLL	bin992	bin1224	-0.609998	8.30215	1.80225e-05
SLL	bin1011	bin1697	-0.60057	7.2236	7.1383e-05
SLL	bin1045	bin1205	-0.619515	8.39443	1.01821e-05
SLL	bin1071	bin1817	-0.620506	8.63981	1.24982e-05
SLL	bin1120	bin1217	-0.723877	11.0484	3.27958e-07
SLL	bin1120	bin1219	-0.723877	11.0484	3.27958e-07
SLL	bin1121	bin1399	-0.552281	6.83122	8.32704e-05
SLL	bin1133	bin1819	-0.564327	7.32147	4.81934e-05
SLL	bin1205	bin2124	-0.552805	6.9626	5.70753e-05
SLL	bin1209	bin2467	-0.558622	7.07132	5.91689e-05
SLL	bin1214	bin1861	-0.700106	11.3228	3.83244e-07
SLL	bin1227	bin1787	-0.61184	7.6335	3.59712e-05
SLL	bin1324	bin1823	-0.626137	9.04936	5.77943e-06
SLL	bin1377	bin1954	-0.554337	6.94883	9.45854e-05
SLL	bin1456	bin1905	-0.655336	8.99425	5.41748e-06
SLL	bin1457	bin1893	-0.601874	7.66442	2.45358e-05
SLL	bin1575	bin2697	-0.59478	7.86417	8.92961e-06
SLL	bin1576	bin2697	-0.59478	7.86417	8.92961e-06
SLL	bin1578	bin2687	-0.647047	8.56286	4.45555e-06
SLL	bin1579	bin1860	-0.569922	7.34644	2.48727e-05
SLL	bin1582	bin1823	-0.590795	7.81771	1.94579e-05
SLL	bin1620	bin2091	-0.616025	7.60546	3.86394e-05
SLL	bin1624	bin2745	-0.600497	8.33888	1.2318e-05
SLL	bin1663	bin2002	-0.648463	9.70415	3.93317e-06
SLL	bin1709	bin1912	-0.768007	13.2036	4.67489e-08
SLL	bin1715	bin2003	-0.657337	9.78688	3.55365e-06
SLL	bin1778	bin2745	-0.582727	7.51812	3.02635e-05
SLL	bin1824	bin2399	-0.596975	8.00118	2.14905e-05
SLL	bin1825	bin2425	-0.599407	7.93082	2.26105e-05
SLL	bin1832	bin2419	-0.620118	8.20059	1.46581e-05
SLL	bin1865	bin2191	-0.640408	9.52644	3.44304e-06
SLL	bin1886	bin2601	-0.585861	7.51324	3.34414e-05
SLL	bin1893	bin2691	-0.583964	7.87761	2.41563e-05
SLL	bin1916	bin2216	0.732439	12.1179	1.92228e-07
SLL	bin1926	bin2725	-0.712531	11.0361	6.88438e-07
SLL	bin1950	bin2601	-0.623541	8.4592	1.17618e-05
SLL	bin2059	bin2624	-0.564439	6.90698	9.81901e-05
SLL	bin2092	bin2676	-0.686378	9.94703	2.57796e-06
SLL	bin2092	bin2731	-0.581291	6.98563	9.4579e-05
FLSL	bin19	bin2218	-0.197935	9.6062	4.04085e-06
FLSL	bin21	bin2765	0.165677	7.0038	8.59564e-05
FLSL	bin35	bin2200	-0.170714	7.64634	4.44077e-05
FLSL	bin50	bin1006	-0.167524	7.15517	8.10922e-05
FLSL	bin51	bin1898	-0.190286	10.0123	2.49276e-06
FLSL	bin54	bin1961	-0.234303	15.2844	3.64391e-09
FLSL	bin63	bin255	-0.195822	10.9503	8.41171e-07
FLSL	bin67	bin1817	-0.185123	9.57567	4.50215e-06
FLSL	bin86	bin2131	-0.160259	7.00313	9.47513e-05
FLSL	bin88	bin259	-0.159464	7.25545	6.7431e-05
FLSL	bin143	bin1200	-0.190479	9.93557	2.68092e-06
FLSL	bin155	bin1458	-0.186097	7.35542	4.60038e-05
FLSL	bin184	bin1205	-0.205402	11.1794	5.36238e-07
FLSL	bin185	bin1224	-0.202258	10.8276	6.85083e-07
FLSL	bin189	bin2171	-0.16149	7.30808	6.15873e-05
FLSL	bin195	bin2687	-0.217674	10.8767	4.03925e-07
FLSL	bin205	bin1640	-0.175472	8.16332	2.11387e-05
FLSL	bin253	bin1037	-0.179976	8.44997	1.67892e-05
FLSL	bin254	bin1373	-0.207611	12.3863	1.30305e-07
FLSL	bin255	bin2637	-0.182513	8.96528	8.57124e-06
FLSL	bin255	bin668	-0.169429	7.12356	8.41126e-05
FLSL	bin255	bin1222	-0.166742	7.80855	3.45064e-05
FLSL	bin255	bin1290	-0.165525	7.91423	3.12593e-05
FLSL	bin255	bin1377	-0.205144	12.1203	1.84451e-07
FLSL	bin256	bin612	-0.158487	7.11728	8.64708e-05
FLSL	bin258	bin1030	-0.196086	9.54024	4.73604e-06
FLSL	bin263	bin1554	-0.177796	9.02509	6.13039e-06
FLSL	bin266	bin2439	-0.161679	7.56464	4.0689e-05
FLSL	bin268	bin2270	-0.169282	8.49955	1.10083e-05
FLSL	bin272	bin2507	-0.158037	6.94843	9.41742e-05
FLSL	bin272	bin1186	-0.166093	8.07124	2.53619e-05
FLSL	bin274	bin2127	-0.185727	9.60443	3.87697e-06
FLSL	bin294	bin659	-0.158006	6.63449	8.93314e-05
FLSL	bin324	bin657	-0.174796	6.6761	8.19417e-05
FLSL	bin360	bin1398	-0.158183	7.13156	8.23505e-05
FLSL	bin405	bin2672	-0.161065	7.14922	8.07028e-05
FLSL	bin406	bin2637	-0.160385	7.12087	8.25133e-05
FLSL	bin407	bin1290	-0.162071	7.54066	4.94674e-05
FLSL	bin424	bin1637	-0.166609	7.81166	3.30681e-05
FLSL	bin426	bin1638	-0.160049	7.24138	6.62976e-05
FLSL	bin496	bin2764	0.155057	6.87531	9.9502e-05
FLSL	bin557	bin849	0.158554	7.0668	8.48453e-05
FLSL	bin619	bin1034	-0.165455	7.30416	6.73894e-05
FLSL	bin657	bin2479	-0.182927	8.61791	1.21908e-05
FLSL	bin659	bin1033	-0.204694	9.3381	6.13882e-06
FLSL	bin662	bin1007	-0.169757	7.63509	4.49479e-05
FLSL	bin664	bin1965	-0.180975	8.96766	8.77596e-06
FLSL	bin666	bin796	-0.159809	6.89673	9.46848e-05
FLSL	bin667	bin956	-0.174339	8.07165	2.7517e-05
FLSL	bin667	bin1824	-0.183867	8.6988	1.26563e-05
FLSL	bin795	bin2620	-0.160823	7.15516	6.70553e-05
FLSL	bin818	bin919	-0.15413	7.02046	7.64661e-05
FLSL	bin914	bin1842	-0.160709	7.21938	6.25967e-05
FLSL	bin943	bin1637	-0.176373	8.95392	7.22945e-06
FLSL	bin958	bin1196	-0.178827	9.48724	5.03499e-06
FLSL	bin958	bin1403	-0.191757	10.5179	1.45224e-06
FLSL	bin988	bin2724	-0.210992	12.6603	1.02404e-07
FLSL	bin996	bin1225	-0.163104	7.46326	5.37339e-05
FLSL	bin1006	bin2751	-0.207003	11.462	3.54749e-07
FLSL	bin1027	bin1194	-0.188619	9.49698	4.98009e-06
FLSL	bin1029	bin1203	-0.193682	9.78864	3.41193e-06
FLSL	bin1030	bin1404	-0.191263	9.53955	4.66741e-06
FLSL	bin1071	bin1823	-0.160166	7.37142	6.3829e-05
FLSL	bin1119	bin1203	-0.165676	7.43961	5.10566e-05
FLSL	bin1120	bin1213	-0.183743	9.01846	6.65493e-06
FLSL	bin1122	bin1820	-0.178516	9.2327	6.66873e-06
FLSL	bin1129	bin1813	-0.18562	9.78209	3.47741e-06
FLSL	bin1167	bin1679	-0.169099	7.89142	3.33967e-05
FLSL	bin1174	bin2680	-0.177594	8.80466	8.71876e-06
FLSL	bin1200	bin2485	-0.162404	6.99061	8.53436e-05
FLSL	bin1205	bin2140	-0.160675	7.22334	6.19693e-05
FLSL	bin1207	bin1867	-0.205266	12.2287	1.75275e-07
FLSL	bin1269	bin2691	-0.157965	7.07071	7.45709e-05
FLSL	bin1335	bin1824	-0.16192	7.36885	6.2997e-05
FLSL	bin1370	bin2713	-0.158367	7.23749	7.04586e-05
FLSL	bin1374	bin2690	-0.166446	7.37718	5.79019e-05
FLSL	bin1456	bin1905	-0.208463	11.4435	3.54685e-07
FLSL	bin1457	bin1932	-0.207908	11.7439	1.89457e-07
FLSL	bin1578	bin2685	-0.174401	7.76869	2.13023e-05
FLSL	bin1613	bin2484	-0.157346	6.95576	9.10424e-05
FLSL	bin1620	bin2093	-0.183514	8.70852	1.26574e-05
FLSL	bin1643	bin1820	-0.172905	8.37555	1.94155e-05
FLSL	bin1726	bin1908	-0.198947	10.9161	8.00244e-07
FLSL	bin1733	bin1900	-0.208343	11.9682	2.33285e-07
FLSL	bin1764	bin1957	-0.160178	7.55955	4.91795e-05
FLSL	bin1881	bin2680	-0.195918	11.1039	5.89821e-07
FLSL	bin1886	bin2628	-0.210082	12.5414	1.01959e-07
FLSL	bin1898	bin2773	-0.170867	7.95374	2.82872e-05
FLSL	bin1900	bin2617	-0.170939	8.23563	2.26637e-05
FLSL	bin1904	bin2171	-0.171586	8.34327	1.97123e-05
FLSL	bin1923	bin2725	-0.197717	10.6847	1.12501e-06
FLSL	bin1950	bin2601	-0.175962	8.47031	1.60464e-05
FLSL	bin1952	bin2183	-0.15407	6.98782	9.43861e-05
FLSL	bin2078	bin2676	-0.222843	13.3709	3.97421e-08
SDW	bin2417	bin2656	-0.850527	7.31558	6.44886e-05
SDW	bin2422	bin2711	-0.892733	8.77732	1.11953e-05
SDW	bin104	bin901	0.884964	8.34403	1.58384e-05
SDW	bin148	bin911	0.842687	7.1093	6.3519e-05
SDW	bin207	bin438	-0.827978	7.2269	5.46951e-05
SDW	bin208	bin439	-0.843245	7.52839	4.09274e-05
SDW	bin262	bin439	-0.911541	8.94032	7.37792e-06
SDW	bin271	bin435	-0.88005	8.23633	1.48461e-05
SDW	bin341	bin2649	-0.855865	7.01159	9.77498e-05
SDW	bin344	bin1267	-0.859155	7.21415	7.30829e-05
SDW	bin426	bin1720	0.857162	7.44939	4.96308e-05
SDW	bin445	bin1805	-0.872362	7.81556	2.88096e-05
SDW	bin464	bin2713	-0.839499	7.58608	4.45009e-05
SDW	bin468	bin1783	-0.893818	7.82774	2.63077e-05
SDW	bin488	bin1723	0.835557	7.18068	8.04073e-05
SDW	bin542	bin696	0.900001	7.35062	5.52917e-05
SDW	bin1283	bin2688	-0.868127	7.60027	4.70988e-05
SDW	bin1330	bin1702	-0.865785	7.78692	1.58679e-05
SDW	bin1679	bin2506	-0.788725	6.85348	7.47885e-05

## Sheet: HD_Ex3
Table S6. Two-locus combinations showing significant epistatic effects under HD. LD, low density; MD, medium density; HD, high density; SH, seedling height; FLSL, first leaf sheath length; FLL, first leaf length; SLL, second leaf length; SDW, shoot dry weight; RDW, root dry weight. Var, the percentage (%) of variation explained by the interaction.
Trait	Locus_1	Locus_2	Epistasis_effect	Var	p_value
FLL	bin20	bin1442	0.297946	7.66766	3.06721e-05
FLL	bin99	bin1182	0.271073	7.96973	1.60438e-05
FLL	bin141	bin1776	-0.279892	7.78489	1.32222e-05
FLL	bin143	bin729	-0.282567	6.33495	9.58893e-05
FLL	bin225	bin1197	-0.243478	6.48778	7.39236e-05
FLL	bin271	bin1994	-0.276098	8.5217	7.68843e-06
FLL	bin275	bin1983	-0.273472	8.03388	1.17721e-05
FLL	bin290	bin1975	-0.294034	9.01514	4.33578e-06
FLL	bin336	bin653	-0.309552	7.93561	2.32061e-05
FLL	bin559	bin2438	0.266014	7.91354	9.63689e-06
FLL	bin563	bin1174	0.248133	6.80417	6.37174e-05
FLL	bin590	bin2642	-0.258138	7.42563	2.27436e-05
FLL	bin653	bin2714	-0.26047	7.02928	5.56773e-05
FLL	bin657	bin1338	-0.258527	7.54343	3.18995e-05
FLL	bin666	bin1785	-0.303877	9.17234	3.49064e-06
FLL	bin680	bin2434	-0.31565	7.81026	1.61687e-05
FLL	bin685	bin2758	-0.29547	7.03753	7.13036e-05
FLL	bin685	bin1765	-0.354852	9.68057	1.69973e-06
FLL	bin725	bin1922	-0.273062	7.17895	4.34789e-05
FLL	bin729	bin1905	-0.268666	7.10006	3.69653e-05
FLL	bin730	bin2495	-0.285289	7.39461	2.17756e-05
FLL	bin786	bin1200	-0.256114	7.1312	5.00854e-05
FLL	bin821	bin1791	0.26696	7.05678	4.26934e-05
FLL	bin942	bin1095	-0.268065	7.88126	3.13135e-05
FLL	bin955	bin1418	-0.302495	10.2122	1.7595e-06
FLL	bin1007	bin2015	-0.262728	7.3418	6.4831e-05
FLL	bin1009	bin2011	-0.28951	8.78382	1.16302e-05
FLL	bin1073	bin1812	-0.280186	8.46036	1.39464e-05
FLL	bin1193	bin1780	-0.275716	8.16385	7.63856e-06
FLL	bin1200	bin1785	-0.258189	7.22565	3.41342e-05
FLL	bin1227	bin1787	-0.262306	6.91014	5.19104e-05
FLL	bin1392	bin1734	-0.273933	7.91424	2.67083e-05
FLL	bin1416	bin1681	-0.268467	8.04601	2.40068e-05
FLL	bin1419	bin2139	-0.239076	6.27975	7.10175e-05
FLL	bin1703	bin1912	-0.274911	8.28993	1.26536e-05
FLL	bin1714	bin2002	-0.343129	13.0974	6.25762e-08
FLL	bin1749	bin2541	-0.270667	7.89291	2.9498e-05
FLL	bin1785	bin2621	-0.261675	7.29059	2.62809e-05
FLL	bin1827	bin2403	-0.259342	7.0581	2.4739e-05
FLL	bin1915	bin2214	0.287226	9.13158	4.4557e-06
SH	bin2289	bin2558	-0.771709	9.13824	6.8055e-06
SH	bin23	bin2387	0.845843	9.13473	7.63925e-06
SH	bin31	bin2204	-0.982266	10.7759	1.0452e-06
SH	bin54	bin1864	-0.816853	9.72962	3.3726e-06
SH	bin64	bin1962	-0.802678	9.25213	6.1774e-06
SH	bin65	bin1820	-0.738724	7.86388	3.3914e-05
SH	bin66	bin1817	-0.744931	7.976	2.7488e-05
SH	bin70	bin1393	-0.717017	7.35609	6.06179e-05
SH	bin73	bin2595	-0.867065	7.09584	8.44972e-05
SH	bin107	bin902	0.708749	7.52802	4.70529e-05
SH	bin2557	bin2638	-0.725768	7.72444	3.64049e-05
SH	bin148	bin2461	0.926048	12.0665	1.14366e-07
SH	bin165	bin1049	-0.716186	7.10939	6.68233e-05
SH	bin184	bin1204	-0.82372	9.18485	6.59226e-06
SH	bin189	bin2174	-0.713366	7.35839	6.30693e-05
SH	bin201	bin1195	-0.698741	7.04616	8.77186e-05
SH	bin247	bin1224	-0.73719	7.89132	2.74386e-05
SH	bin254	bin666	-0.764448	7.64002	4.57704e-05
SH	bin257	bin614	-0.851537	10.7049	1.04161e-06
SH	bin270	bin2270	-0.736373	8.31835	1.29812e-05
SH	bin270	bin659	-0.694101	6.76941	9.61053e-05
SH	bin273	bin2504	-0.685674	6.67749	6.82634e-05
SH	bin274	bin1984	-0.734903	7.75838	2.85999e-05
SH	bin275	bin1187	-0.784663	9.23503	4.48639e-06
SH	bin291	bin2475	-0.757256	8.39709	5.21854e-06
SH	bin301	bin1594	-0.717312	6.2524	7.57131e-05
SH	bin455	bin2671	-0.715553	7.39033	6.10674e-05
SH	bin632	bin1226	-0.713349	7.36072	4.72891e-05
SH	bin659	bin1033	-0.815376	7.67599	4.44368e-05
SH	bin668	bin1824	-0.843025	9.27622	6.53435e-06
SH	bin731	bin1035	-0.919891	7.15571	8.23237e-05
SH	bin809	bin2672	-0.704904	7.41421	5.90685e-05
SH	bin831	bin2301	-0.702291	6.98712	9.0172e-05
SH	bin852	bin2296	-0.786953	8.88548	9.73503e-06
SH	bin951	bin2305	-0.728466	7.97358	2.43939e-05
SH	bin976	bin2310	-0.739486	8.25942	1.58018e-05
SH	bin976	bin2724	-0.872307	11.6351	3.60431e-07
SH	bin1006	bin2723	-0.893441	11.4957	3.99515e-07
SH	bin1028	bin1403	-0.842213	9.76504	3.65714e-06
SH	bin1032	bin2479	-0.745794	7.09977	6.69897e-05
SH	bin1127	bin1912	-0.720626	7.21024	6.41973e-05
SH	bin1130	bin1908	-0.763303	7.86635	2.94549e-05
SH	bin1148	bin1902	-0.715658	7.26993	6.65793e-05
SH	bin1148	bin2102	-0.810537	9.14037	7.01832e-06
SH	bin1152	bin2077	-0.732654	7.83085	2.52544e-05
SH	bin1173	bin2106	-0.728887	7.81357	3.78976e-05
SH	bin1212	bin1867	-0.799344	9.5578	4.25947e-06
SH	bin1220	bin1814	-0.740961	8.20553	2.05682e-05
SH	bin1268	bin1462	-0.76828	8.26413	2.12118e-05
SH	bin1273	bin2680	-0.747039	8.09229	2.21424e-05
SH	bin1276	bin1470	-0.706145	7.16922	7.5341e-05
SH	bin1280	bin1701	-0.804789	9.59041	4.14745e-06
SH	bin1456	bin2479	-0.763688	7.2262	5.87769e-05
SH	bin1456	bin1832	-0.740639	7.10917	8.75579e-05
SH	bin1456	bin1914	-0.880151	10.7034	1.11627e-06
SH	bin1458	bin1899	-0.900836	11.2574	6.02391e-07
SH	bin1474	bin2084	-0.801847	8.55873	1.15736e-05
SH	bin1512	bin2072	-0.851097	9.5587	3.74619e-06
SH	bin1590	bin2335	-0.745321	8.09085	2.56384e-05
SH	bin1598	bin2299	-0.743868	8.05802	2.44781e-05
SH	bin1601	bin2742	-0.711736	7.63139	4.32363e-05
SH	bin1601	bin2105	-0.831117	10.2086	2.06549e-06
SH	bin1639	bin2086	-0.895275	10.7231	6.74032e-07
SH	bin1670	bin1898	-0.759952	8.68475	1.23465e-05
SH	bin1699	bin2135	-0.692821	6.97959	9.42466e-05
SH	bin1735	bin1901	-0.80098	9.29556	5.42392e-06
SH	bin1771	bin1962	-0.687387	6.99971	9.90937e-05
SH	bin1837	bin2306	-0.784058	9.17121	5.48101e-06
SH	bin1886	bin2637	-0.851956	11.0118	6.81349e-07
SH	bin1893	bin2760	-0.713171	6.98983	8.31556e-05
SH	bin1895	bin2619	-0.826471	10.0728	2.01358e-06
SH	bin1898	bin2618	-0.806944	9.5891	3.50147e-06
SH	bin1901	bin2386	-0.721687	7.57936	4.90041e-05
SH	bin1907	bin2602	-0.715783	7.33533	6.53217e-05
SH	bin1908	bin2730	-0.759516	7.43744	5.47863e-05
SH	bin1923	bin2727	-0.71146	7.11606	8.15795e-05
SH	bin1950	bin2601	-0.721434	7.37609	6.18224e-05
SH	bin2048	bin2778	-0.742808	7.77711	3.74219e-05
SH	bin2078	bin2676	-0.74897	7.82456	3.23002e-05
SH	bin2086	bin2448	-0.817445	8.22989	1.66553e-05
SH	bin2088	bin2742	-0.81956	9.57953	3.84422e-06
SH	bin2094	bin2728	-0.722353	6.92841	9.75648e-05
RDW	bin1022	bin2657	-0.347495	8.13903	1.9698e-05
RDW	bin1166	bin2276	-0.327451	8.41555	1.72062e-05
SLL	bin19	bin1442	0.640131	6.68865	7.98031e-05
SLL	bin29	bin2765	0.662544	7.19508	7.86557e-05
SLL	bin40	bin1905	-0.717218	10.1032	1.6758e-06
SLL	bin49	bin255	-0.627289	8.01247	1.72508e-05
SLL	bin53	bin1861	-0.728236	11.1749	4.29848e-07
SLL	bin53	bin1962	-0.68706	9.6698	2.99342e-06
SLL	bin88	bin261	-0.552368	6.59975	6.56713e-05
SLL	bin2400	bin2719	-0.623007	8.31415	9.81344e-06
SLL	bin105	bin2745	-0.629398	8.11947	1.36095e-05
SLL	bin130	bin643	-0.601278	7.33772	4.88651e-05
SLL	bin150	bin2458	0.575039	6.62592	7.9481e-05
SLL	bin177	bin323	-0.58025	6.57874	7.55566e-05
SLL	bin185	bin1224	-0.616769	7.45313	2.80045e-05
SLL	bin193	bin2687	-0.688644	8.38729	4.94059e-06
SLL	bin193	bin2745	-0.660352	9.26588	1.47299e-06
SLL	bin193	bin1679	-0.548214	6.24569	8.78487e-05
SLL	bin194	bin1458	-0.571806	6.23031	6.80226e-05
SLL	bin198	bin1215	-0.593985	6.68096	5.34361e-05
SLL	bin206	bin1654	-0.57007	6.67606	5.88769e-05
SLL	bin207	bin2174	-0.631779	8.11252	7.92496e-06
SLL	bin219	bin1052	-0.643451	8.22533	1.00458e-05
SLL	bin225	bin1296	-0.547051	6.54564	9.00853e-05
SLL	bin249	bin2750	-0.583933	7.18698	4.69065e-05
SLL	bin254	bin2608	-0.575982	6.63011	9.09474e-05
SLL	bin254	bin1173	-0.584548	7.18072	4.66121e-05
SLL	bin254	bin1222	-0.666821	9.09959	4.46447e-06
SLL	bin254	bin1376	-0.627568	8.38771	1.04721e-05
SLL	bin255	bin1320	-0.593181	7.39124	3.82727e-05
SLL	bin255	bin1374	-0.622087	8.25038	1.35597e-05
SLL	bin256	bin1027	-0.616133	7.18988	5.89484e-05
SLL	bin261	bin1938	-0.671816	9.76299	2.50985e-06
SLL	bin271	bin1984	-0.713152	10.6301	9.69872e-07
SLL	bin274	bin1922	-0.686646	9.28929	4.89497e-06
SLL	bin277	bin1011	-0.61243	7.53251	4.49998e-05
SLL	bin281	bin1945	-0.722094	10.6216	9.33923e-07
SLL	bin288	bin2437	-0.586621	6.97126	7.64429e-05
SLL	bin290	bin1971	-0.739973	10.3295	1.67098e-06
SLL	bin325	bin653	-0.730952	8.85731	6.91121e-06
SLL	bin489	bin1479	0.605414	6.95312	6.70614e-05
SLL	bin565	bin1538	0.56611	6.65962	6.48219e-05
SLL	bin618	bin651	-0.613266	7.80364	2.99352e-05
SLL	bin658	bin1339	-0.573572	6.87499	8.82236e-05
SLL	bin666	bin1785	-0.62165	7.25423	5.9241e-05
SLL	bin666	bin2128	-0.590748	6.67146	8.92145e-05
SLL	bin667	bin2418	-0.622236	7.65487	2.96806e-05
SLL	bin667	bin1007	-0.696531	9.23244	6.25601e-06
SLL	bin667	bin1913	-0.670918	8.94694	8.40771e-06
SLL	bin667	bin1965	-0.60735	7.41549	5.55458e-05
SLL	bin667	bin2102	-0.634266	6.99906	8.71343e-05
SLL	bin670	bin2432	-0.600803	6.73879	9.6387e-05
SLL	bin670	bin1594	-0.604594	6.91999	7.30741e-05
SLL	bin671	bin2432	-0.600803	6.73879	9.6387e-05
SLL	bin671	bin1594	-0.604594	6.91999	7.30741e-05
SLL	bin672	bin2754	-0.654044	7.84382	2.89591e-05
SLL	bin685	bin1750	-0.798127	9.07876	5.78604e-06
SLL	bin699	bin2751	-0.646543	6.94524	6.18068e-05
SLL	bin708	bin1761	-0.661558	9.06294	5.20884e-06
SLL	bin717	bin1167	-0.583448	6.71586	8.80367e-05
SLL	bin720	bin1633	-0.712706	9.04466	3.07984e-06
SLL	bin729	bin1907	-0.6624	8.15628	1.1773e-05
SLL	bin737	bin1296	-0.624325	6.62121	5.87668e-05
SLL	bin775	bin1190	-0.600373	7.12779	6.01305e-05
SLL	bin777	bin2624	-0.644556	8.09644	2.0641e-05
SLL	bin782	bin1171	-0.636957	7.57733	3.94169e-05
SLL	bin798	bin1207	-0.571969	7.105	4.22527e-05
SLL	bin906	bin1560	0.608156	7.40022	1.4338e-05
SLL	bin907	bin1561	0.608156	7.40022	1.4338e-05
SLL	bin955	bin1669	-0.604085	7.94186	2.85061e-05
SLL	bin959	bin1196	-0.633957	8.81211	7.59246e-06
SLL	bin959	bin1406	-0.755392	12.2423	1.17299e-07
SLL	bin986	bin2719	-0.766118	12.4555	9.79122e-08
SLL	bin1045	bin1206	-0.648739	8.73018	5.826e-06
SLL	bin1071	bin1817	-0.656665	9.0061	7.51687e-06
SLL	bin1113	bin1210	-0.597042	7.60509	3.08616e-05
SLL	bin1120	bin1219	-0.651271	8.32398	1.06154e-05
SLL	bin1133	bin1818	-0.595811	7.5918	3.38168e-05
SLL	bin1173	bin1912	-0.603517	7.08386	7.62343e-05
SLL	bin1213	bin1958	-0.573214	7.04726	7.65567e-05
SLL	bin1214	bin1869	-0.737201	11.5957	2.46009e-07
SLL	bin1324	bin1823	-0.600884	7.75705	2.74365e-05
SLL	bin1377	bin1959	-0.601809	7.60195	4.2816e-05
SLL	bin1456	bin1907	-0.683987	9.11946	4.28489e-06
SLL	bin1457	bin1892	-0.630316	7.8469	1.74522e-05
SLL	bin1538	bin2317	0.594233	6.90113	4.03219e-05
SLL	bin1577	bin2697	-0.578086	6.86624	3.3076e-05
SLL	bin1579	bin1861	-0.686339	9.91081	7.1024e-07
SLL	bin1582	bin1823	-0.68449	9.76734	1.4272e-06
SLL	bin1600	bin2741	-0.640105	7.99614	2.93e-05
SLL	bin1620	bin2074	-0.689242	8.52294	1.17448e-05
SLL	bin1640	bin2135	-0.58246	6.84828	6.37641e-05
SLL	bin1703	bin2135	-0.584711	7.01811	5.46891e-05
SLL	bin1709	bin1912	-0.778402	12.6243	9.32273e-08
SLL	bin1715	bin2003	-0.666046	9.35218	5.95061e-06
SLL	bin1749	bin2542	-0.603413	7.35312	5.9964e-05
SLL	bin1777	bin2746	-0.623236	8.04304	1.91107e-05
SLL	bin1785	bin2621	-0.644929	8.36905	1.3979e-05
SLL	bin1824	bin2399	-0.695479	10.1076	1.38779e-06
SLL	bin1824	bin2185	-0.598022	7.46716	4.1037e-05
SLL	bin1865	bin2171	-0.625418	8.38362	1.38805e-05
SLL	bin1869	bin2190	-0.602551	7.84949	2.36203e-05
SLL	bin1890	bin2646	-0.589136	7.55657	3.59699e-05
SLL	bin1893	bin2691	-0.581412	7.26819	4.31975e-05
SLL	bin1907	bin2601	-0.632221	8.02765	1.65101e-05
SLL	bin1916	bin2214	0.680556	9.73754	3.5455e-06
SLL	bin1926	bin2725	-0.710761	10.2209	1.70761e-06
SLL	bin2049	bin2177	-0.60817	7.7892	2.36795e-05
SLL	bin2092	bin2729	-0.68428	9.02169	7.52805e-06
SLL	bin2093	bin2741	-0.687019	9.15952	6.55464e-06
FLSL	bin33	bin2204	-0.20789	7.66908	4.21401e-05
FLSL	bin53	bin1862	-0.195388	8.75904	1.19532e-05
FLSL	bin54	bin1334	-0.180114	7.28274	7.04981e-05
FLSL	bin54	bin1961	-0.263582	15.6348	2.31339e-09
FLSL	bin64	bin254	-0.21634	10.7523	1.09209e-06
FLSL	bin67	bin2200	-0.178563	7.29117	7.06333e-05
FLSL	bin71	bin496	0.178519	7.23721	6.62105e-05
FLSL	bin86	bin2130	-0.195659	8.56346	1.28948e-05
FLSL	bin88	bin259	-0.194203	8.69794	1.16453e-05
FLSL	bin99	bin2672	-0.183393	7.47268	5.50906e-05
FLSL	bin2498	bin2751	-0.196535	8.36613	1.74162e-05
FLSL	bin157	bin2746	-0.195042	8.56141	1.13283e-05
FLSL	bin184	bin1223	-0.241056	12.3222	1.12719e-07
FLSL	bin187	bin260	-0.177463	7.11459	7.47848e-05
FLSL	bin193	bin1195	-0.214806	10.3191	1.46043e-06
FLSL	bin195	bin2687	-0.231107	9.91013	2.04459e-06
FLSL	bin205	bin1640	-0.218673	10.2474	1.70967e-06
FLSL	bin213	bin1508	-0.201873	7.6621	3.89966e-05
FLSL	bin218	bin1048	-0.187347	7.91981	2.76021e-05
FLSL	bin244	bin1595	-0.18035	7.27535	6.90939e-05
FLSL	bin251	bin1169	-0.177182	7.20664	7.73947e-05
FLSL	bin254	bin2636	-0.196689	8.34653	1.98733e-05
FLSL	bin254	bin328	-0.244421	11.5012	2.20014e-07
FLSL	bin254	bin1377	-0.207515	9.98311	2.61209e-06
FLSL	bin255	bin668	-0.195711	7.68278	4.36765e-05
FLSL	bin256	bin1027	-0.195641	7.91572	3.32728e-05
FLSL	bin257	bin614	-0.194713	8.73306	1.22518e-05
FLSL	bin259	bin2441	-0.183351	7.73265	3.61579e-05
FLSL	bin259	bin2127	-0.192145	8.4721	1.42552e-05
FLSL	bin262	bin1812	-0.218995	11.074	7.2512e-07
FLSL	bin263	bin659	-0.184288	7.5754	4.89945e-05
FLSL	bin263	bin1224	-0.189788	8.46475	1.60234e-05
FLSL	bin263	bin1554	-0.185094	7.90601	2.48535e-05
FLSL	bin266	bin1814	-0.217862	10.733	9.6669e-07
FLSL	bin266	bin1985	-0.178633	7.39887	5.73906e-05
FLSL	bin269	bin2270	-0.174985	7.34082	4.46928e-05
FLSL	bin270	bin1994	-0.176891	7.31913	6.04227e-05
FLSL	bin272	bin1186	-0.171874	6.98596	9.33899e-05
FLSL	bin287	bin1533	-0.178769	7.06327	5.78183e-05
FLSL	bin288	bin1175	-0.173209	6.79688	9.46025e-05
FLSL	bin304	bin1591	-0.192228	6.83937	5.37597e-05
FLSL	bin325	bin653	-0.225888	9.23645	3.19139e-06
FLSL	bin337	bin607	-0.19714	7.85011	2.74309e-05
FLSL	bin410	bin2672	-0.178184	7.04733	9.37157e-05
FLSL	bin424	bin1045	-0.178603	7.00872	7.84337e-05
FLSL	bin561	bin852	0.19219	8.40079	1.74394e-05
FLSL	bin615	bin1833	-0.187044	7.07355	8.88809e-05
FLSL	bin617	bin651	-0.175813	6.99182	9.20181e-05
FLSL	bin620	bin1038	-0.186259	7.891	3.05506e-05
FLSL	bin659	bin1033	-0.215496	8.36562	1.96524e-05
FLSL	bin665	bin797	-0.193276	8.23317	2.1713e-05
FLSL	bin667	bin1913	-0.19876	8.57408	1.4218e-05
FLSL	bin667	bin1965	-0.191831	8.0778	2.52705e-05
FLSL	bin667	bin2096	-0.192472	7.28452	6.92387e-05
FLSL	bin669	bin1824	-0.231452	11.0209	7.92707e-07
FLSL	bin670	bin2479	-0.226174	8.78277	1.01912e-05
FLSL	bin670	bin1594	-0.204025	8.6048	1.39857e-05
FLSL	bin720	bin1167	-0.216311	9.69679	3.78982e-06
FLSL	bin721	bin2134	-0.201187	7.98503	2.77604e-05
FLSL	bin731	bin1127	-0.188246	6.93713	9.80066e-05
FLSL	bin737	bin1962	-0.202645	7.50126	4.30828e-05
FLSL	bin818	bin919	-0.170267	6.925	9.35374e-05
FLSL	bin914	bin1842	-0.198308	8.88522	8.49332e-06
FLSL	bin916	bin2408	-0.182146	7.89748	2.40382e-05
FLSL	bin929	bin1637	-0.203662	9.53836	3.26222e-06
FLSL	bin935	bin1380	-0.170732	6.914	9.88547e-05
FLSL	bin958	bin1403	-0.198531	9.11278	7.40029e-06
FLSL	bin962	bin1196	-0.187331	8.34447	2.00344e-05
FLSL	bin976	bin2719	-0.227207	12.3584	1.52641e-07
FLSL	bin979	bin1406	-0.194835	8.65076	1.14843e-05
FLSL	bin1027	bin1194	-0.199944	8.62577	1.43018e-05
FLSL	bin1027	bin1411	-0.200904	8.35189	1.74409e-05
FLSL	bin1030	bin1404	-0.205926	8.93833	8.78972e-06
FLSL	bin1033	bin1193	-0.203111	8.64231	1.3904e-05
FLSL	bin1034	bin2479	-0.1899	7.55833	4.63691e-05
FLSL	bin1044	bin1205	-0.191322	8.21766	1.8971e-05
FLSL	bin1052	bin1843	-0.193124	8.00535	2.63775e-05
FLSL	bin1071	bin1823	-0.211533	10.3929	1.56792e-06
FLSL	bin1113	bin1207	-0.184028	7.78211	3.668e-05
FLSL	bin1120	bin1216	-0.193974	8.13952	1.90314e-05
FLSL	bin1126	bin1825	-0.217366	10.8443	9.49757e-07
FLSL	bin1129	bin1910	-0.182574	7.18631	7.5611e-05
FLSL	bin1167	bin1679	-0.192836	8.29497	2.10548e-05
FLSL	bin1172	bin2078	-0.173957	7.04064	9.00541e-05
FLSL	bin1190	bin1589	-0.196374	8.8905	8.38685e-06
FLSL	bin1195	bin2406	-0.18204	7.90365	2.83055e-05
FLSL	bin1215	bin1860	-0.229647	12.4127	1.4279e-07
FLSL	bin1317	bin1824	-0.178544	7.30845	6.87459e-05
FLSL	bin1340	bin2636	-0.179331	7.08265	9.0889e-05
FLSL	bin1370	bin2691	-0.189228	8.06404	2.75279e-05
FLSL	bin1376	bin1961	-0.177807	7.1292	8.01519e-05
FLSL	bin1457	bin1932	-0.224329	11.0512	4.56786e-07
FLSL	bin1458	bin1900	-0.226075	10.9925	5.92416e-07
FLSL	bin1512	bin2084	-0.191549	7.45819	4.93329e-05
FLSL	bin1537	bin2642	-0.181764	7.08906	6.64565e-05
FLSL	bin1578	bin2685	-0.191158	7.54402	4.17283e-05
FLSL	bin1582	bin1817	-0.187831	8.09944	2.60704e-05
FLSL	bin1620	bin2074	-0.207967	8.47283	1.69827e-05
FLSL	bin1642	bin1820	-0.194615	8.57668	1.4919e-05
FLSL	bin1642	bin1912	-0.201974	9.38539	5.3162e-06
FLSL	bin1699	bin2135	-0.183341	7.62621	3.99047e-05
FLSL	bin1700	bin2003	-0.201253	9.35279	5.81839e-06
FLSL	bin1735	bin1900	-0.263847	15.7414	2.17061e-09
FLSL	bin1749	bin2567	-0.182953	7.70772	4.18069e-05
FLSL	bin1764	bin1957	-0.192369	8.81311	1.07319e-05
FLSL	bin1768	bin1832	-0.182812	7.13326	8.38261e-05
FLSL	bin1771	bin1958	-0.194229	8.77477	1.14552e-05
FLSL	bin1779	bin2647	-0.18956	8.10804	2.65114e-05
FLSL	bin1786	bin2675	-0.187751	7.91838	3.36099e-05
FLSL	bin1810	bin1978	-0.196646	8.64393	1.22335e-05
FLSL	bin1823	bin2318	-0.178038	7.14565	7.61648e-05
FLSL	bin1824	bin2395	-0.176298	7.15894	8.27275e-05
FLSL	bin1886	bin2636	-0.242447	13.9141	2.1386e-08
FLSL	bin1889	bin2646	-0.237394	13.4327	3.51498e-08
FLSL	bin1898	bin2618	-0.205098	9.66531	4.05125e-06
FLSL	bin1898	bin2773	-0.183088	7.38145	5.81461e-05
FLSL	bin1901	bin2171	-0.185267	7.87639	3.48831e-05
FLSL	bin1926	bin2725	-0.203699	9.16675	6.97725e-06
FLSL	bin1950	bin2602	-0.20082	9.08491	7.22777e-06
FLSL	bin1961	bin2686	-0.19027	7.82826	3.52277e-05
FLSL	bin2077	bin2678	-0.261883	14.767	7.72448e-09
FLSL	bin2091	bin2748	-0.205928	9.04563	8.02215e-06
SDW	bin2415	bin2655	-0.985895	11.6558	3.18006e-07
SDW	bin2422	bin2711	-0.977394	12.361	1.39491e-07
SDW	bin101	bin903	0.745047	7.00236	8.70545e-05
SDW	bin2606	bin2774	0.790095	7.36997	6.27453e-05
SDW	bin344	bin1267	-0.817103	7.6664	4.10369e-05
SDW	bin434	bin1217	-0.745998	6.91609	7.46457e-05
SDW	bin435	bin2399	-0.765557	7.04381	6.25946e-05
SDW	bin436	bin852	-0.777541	7.62471	2.5763e-05
SDW	bin439	bin1122	-0.733923	6.85281	5.41451e-05
SDW	bin444	bin837	-0.744385	6.98553	7.75835e-05
SDW	bin445	bin1783	-0.793475	7.45408	4.27832e-05
SDW	bin488	bin723	0.811464	7.20119	7.88064e-05
SDW	bin488	bin1712	0.889402	9.38916	5.32341e-06
SDW	bin542	bin696	0.919659	9.01753	8.09452e-06
SDW	bin827	bin1998	0.747616	6.78347	9.97831e-05
SDW	bin846	bin2308	-0.845572	8.42777	1.46037e-05
SDW	bin1029	bin1399	-0.782195	7.09767	8.92142e-05
SDW	bin1038	bin2720	-0.78996	7.80716	3.68506e-05
SDW	bin1166	bin2307	-0.787294	7.73975	3.84059e-05
SDW	bin1283	bin2714	-0.744166	7.01793	9.75634e-05
SDW	bin1283	bin1700	-0.923347	10.2686	1.70911e-06
SDW	bin1320	bin1646	-0.823105	8.0827	2.23766e-05
SDW	bin1462	bin2230	-0.790343	7.18615	7.24644e-05
SDW	bin1935	bin2525	0.76092	7.38286	3.03589e-05
SDW	bin2086	bin2460	-0.867772	8.6282	1.37055e-05
